# Supplementary material
Source: PubMed Central journal article supplement (PMC6400323)
Supplement: NIHMS1512237-supplement-7.pdf [file NIHMS1512237-supplement-7.pdf]

1 **Online Figure Legends:**

2 **FIG E1. CD19<sup>hi</sup>CD21<sup>-/lo</sup>CD10<sup>-</sup>CD27<sup>-</sup> B cell frequencies in CVID patients with and without**  
3 **AICs.** Dot plots from representative subjects and pooled subset frequencies. Dark bars represent  
4 average group values. Statistically significant differences are indicated, \*\*\*\*P <0.0001 (Mann-  
5 Whitney U tests).

6  
7 **FIG E2. The IgG heavy chain repertoire of CVID+AIC patients is skewed toward VH4**  
8 **gene usage.** Pooled VH gene segment usage frequencies of the indicated subjects are  
9 represented. Light bars indicate standard error of the mean. Statistically significant differences  
10 are indicated, \*\*P <0.01, \*P <0.05 (Mann-Whitney U tests).

11  
12 **FIG E3. CVID-AIC patients display germinal centers hypoplasia.** A hematoxylin and eosin  
13 (H&E) stained excisional axillary (left) and cervical (right) lymph node biopsies from two  
14 additional CVID-AIC patients. GCs are outlined with white dashed lines. Original magnification,  
15 12.5X.

16  
17 **FIG E4. Asymmetric, enlarged germinal centers (GCs) predominate in lymph nodes from**  
18 **eleven additional CVID+AIC patients.** Hematoxylin and eosin (H&E) stained excisional  
19 inguinal lymph node biopsies from (starting at top, from left to right) CVIDC14, CVIDC78,  
20 CVIDC6 and CVIDC3. An H&E iliac lymph node biopsy from CVIDMS1. H&E stained axillary  
21 lymph node biopsies from CVIDMS2, CVIDY43, CVIDY12, CVIDC76 and CVIDCA1. A  
22 H&E stained cervical lymph node removed during the autopsy of CVIDYA1. GCs are outlined  
23 with white dashed lines. Original magnification, 12.5X.

24

25 **FIG E5. Immunohistochemical staining of an excisional axillary lymph node biopsy from**  
26 **CVID+AIC patient CVIDC6.** Follicular structures are revealed by staining sequential lymph  
27 node sections with hematoxylin and eosin, anti-BCL-6, anti-CD20, anti-CD3 and (E) anti-CD21.

28

29 **FIG E6. Hyperplastic but circular GCs predominate in excised bacterial lymphadenitis**  
30 **(BL) lymph nodes.** (A) A representative hematoxylin and eosin stained cervical lymph node  
31 from an immune competent 3-year-old male with *Moraxella* lymphadenitis but not AICs. GCs  
32 are outlined (white dashed line). (B) The percentage of each analyzed lymph node's total 2-  
33 dimensional cellular area comprised of follicular structures is displayed. (C) The average  
34 circularity quotient of identified follicular structures is displayed. Dark bars represent group  
35 average values. Statistically significant differences are indicated, \*P <0.05 (Mann-Whitney U  
36 tests)

**Table E1-** Demographic and clinical information on CVID patients with and without autoimmune cytopenias

|                   | age <sup>a</sup> | sex | Freiburg classification <sup>b</sup> | VH mutation analysis? | genotype                    | lymph node | AIC | other inflammatory diseases |
|-------------------|------------------|-----|--------------------------------------|-----------------------|-----------------------------|------------|-----|-----------------------------|
| CVIDC18           | 10               | F   | II                                   | -                     | -                           | -          | -   | AS                          |
| CVIDC1            | 16               | M   | Ib                                   | -                     | -                           | -          | -   | DM1                         |
| CVIDC31           | 17               | M   | II                                   | Y                     | -                           | -          | -   | -                           |
| CVIDC48           | 18               | M   | Ib                                   | -                     | -                           | -          | -   | -                           |
| CVIDY39           | 19               | F   | II                                   | Y                     | -                           | -          | -   | -                           |
| C12A <sup>c</sup> | 20               | F   | Ib                                   | Y                     | TACI wt/C104R               | -          | -   | -                           |
| CVIDC17           | 21               | F   | II                                   | -                     | -                           | -          | -   | AS                          |
| CVIDC32           | 22               | M   | II                                   | -                     | -                           | -          | -   | -                           |
| CVIDC67           | 28               | F   | II                                   | -                     | -                           | -          | -   | ILD                         |
| CVIDC83           | 28               | F   | Ib                                   | -                     | CTLA4 wt/G146R              | -          | -   | AIE, AIR                    |
| CVIDC41           | 36               | F   | Ib                                   | -                     | -                           | -          | -   | RA                          |
| CVIDCA2           | 51               | F   | -                                    | -                     | -                           | AN         | -   | BC                          |
| CVID170           | 53               | F   | Ib                                   | Y                     | -                           | -          | -   | -                           |
| CVIDY11           | 54               | M   | II                                   | -                     | -                           | -          | -   | PM                          |
| CVIDCA3           | 56               | M   | -                                    | -                     | -                           | CN         | -   | TC                          |
| CVIDC63           | 60               | F   | Ib                                   | Y                     | -                           | AN         | -   | BC                          |
| CVIDY37           | 63               | F   | II                                   | Y                     | -                           | AN         | -   | BC                          |
| CVIDY41           | 63               | M   | Ib                                   | -                     | -                           | -          | -   | -                           |
| CVIDY33           | 65               | F   | II                                   | -                     | -                           | -          | -   | -                           |
| CVIDY34           | 67               | F   | Ia                                   | -                     | -                           | -          | -   | CD                          |
| CVIDCA1           | 7                | M   | -                                    | -                     | CTLA4 wt/A86fs <sup>§</sup> | AN         | ES  | AIE, LA                     |
| CVIDC9            | 12               | F   | Ia                                   | -                     | -                           | -          | ES  | EC, GR                      |
| CVIDC76           | 14               | M   | Ib                                   | -                     | -                           | INN        | ES  | LA                          |
| CVIDC14           | 15               | M   | Ib                                   | -                     | -                           | INN        | ES  | LA, SP                      |
| CVIDC44           | 15               | M   | Ia                                   | -                     | -                           | -          | ES  | -                           |
| CVIDC11           | 18               | F   | Ia                                   | -                     | -                           | -          | ES  | LA, SP                      |
| CVIDC6            | 19               | M   | Ia                                   | Y                     | CTLA4 wt/R70Q               | INN        | ES  | LA, SP                      |

|                      |    |   |    |   |                |                 |      |            |
|----------------------|----|---|----|---|----------------|-----------------|------|------------|
| CVIDC22              | 19 | M | Ib | - | -              | -               | ITP  | -          |
| CVIDC10              | 23 | F | Ib | - | -              | -               | AIHA | -          |
| CVIDC39              | 23 | F | Ib | - | -              | -               | ITP  | BOOP       |
| CVIDC3               | 23 | M | II | - | -              | INN             | ITP  | -          |
| CVIDC23              | 26 | M | II | - | NFKB1 wt/W783X | -               | ITP  | -          |
| CVIDC78              | 30 | M | Ia | - | TACI wt/C172Y  | INN             | ES   | ILD, PN    |
| CVIDY42              | 39 | M | Ib | - | -              | -               | ITP  | G          |
| CVIDY12              | 40 | F | Ib | - | -              | AN              | ITP  | GR, LA, SP |
| CVIDY15              | 40 | M | Ia | - | TACI wt/C104R  | -               | ITP  | B, G, SP   |
| CVIDY40              | 45 | F | Ib | - | -              | AN              | ITP  | -          |
| CVID292 <sup>d</sup> | 45 | F | Ia | Y | TACI wt/C104R  | -               | ITP  | LA, SP     |
| CVIDC59              | 47 | F | -  | - | -              | -               | ITP  | -          |
| CVIDY17              | 48 | F | Ib | - | TACI wt/C104R  | -               | ES   | B, SP      |
| CVIDY28              | 48 | F | Ib | Y | -              | AN              | ITP  | LA, PN, SP |
| CVIDY43              | 50 | F | Ia | Y | -              | AN              | ITP  | -          |
| CVIDMS2              | 53 | M | -  | - | -              | CN              | ITP  | LA         |
| CVIDC49              | 57 | F | Ia | - | -              | -               | ITP  | -          |
| CVIDY45              | 59 | F | Ia | Y | -              | AN              | ITP  | BC, LA, SP |
| CVIDY20              | 62 | M | Ia | - | -              | -               | ITP  | SP         |
| CVIDMS1              | 63 | F | Ia | Y | -              | ILN             | ITP  | EMC        |
| CVIDYA1              | 67 | M | -  | - | -              | CN <sup>e</sup> | ITP  | -          |
| CVIDY8               | 68 | F | Ia | - | -              | -               | AIHA | -          |

AIE, autoimmune enteropathy; AIHA, autoimmune hemolytic anemia; AIR, autoimmune retinopathy; AN, axillary lymph node; AS, asthma; B, bronchiectasis; BC, breast cancer; BOOP, bronchiolitis obliterans with organizing pneumonia; CD, Crohn's disease; CN, cervical lymph node; DM1, diabetes mellitus type 1; EC, enterocolitis; EMC, endometrial cancer; ES, Evan's syndrome; F, female; G, giardiasis; GR, granulomas; INN, inguinal lymph node; ILN, iliac lymph node; ILD, interstitial lung disease; ITP, immune thrombocytopenia; LA, lymphadenopathy; M, male; ND, not determined; PM, polymyositis; PN, pulmonary nodules; RA, rheumatoid arthritis; SA, sarcoidosis; SP, splenomegaly; TC, thyroid cancer; UC, ulcerative colitis; wt, wild type; Y, yes

<sup>a</sup> Age (years) at time of study enrollment, <sup>b</sup> classification described in Warnatz et al. *Blood* (2002), <sup>c</sup> as described in Castigli et al. *Nat Genet.* (2005), <sup>d</sup> as described in Romberg et al. *J Clin Invest.* (2013), <sup>e</sup> specimen obtained at autopsy, <sup>§</sup> patient has received hematopoietic stem cell transplantation

**Table E2:** IgH repertoire and VH mutations of IgG+ memory B cells from CVIDC31

|                      |      |      |    |    |                         | Length | VH Mutations | FWR1 |   | CDR1 |   | FWR2 |   | CDR2 |   | FWR3 |   |
|----------------------|------|------|----|----|-------------------------|--------|--------------|------|---|------|---|------|---|------|---|------|---|
|                      | VH   | D    | RF | JH | CDR3 (aa)               |        |              | R    | S | R    | S | R    | S | R    | S | R    | S |
| CVIDC31 IgG+ mem 04  | 3-72 | 3-10 | 2  | 4  | AVNYDSDNGHYNVLS         | 16     | 9            | 0    | 1 | 1    | 1 | 0    | 0 | 2    | 1 | 2    | 1 |
| CVIDC31 IgG+ mem 09  | 3-20 | /    | /  | 4  | ARGIRFVYGGQLDY          | 14     | 15           | 2    | 1 | 3    | 0 | 0    | 0 | 1    | 3 | 5    | 0 |
| CVIDC31 IgG+ mem 11  | 3-23 | 3-3  | 3  | 4  | ARDEAIFGVFFDY           | 14     | 20           | 3    | 0 | 1    | 0 | 1    | 1 | 7    | 1 | 5    | 1 |
| CVIDC31 IgG+ mem 21  | 3-30 | 3-10 | 2  | 4  | ARDMFGSGAPDFDY          | 14     | 21           | 0    | 0 | 2    | 0 | 0    | 2 | 11   | 0 | 3    | 3 |
| CVIDC31 IgG+ mem 22  | 3-33 | 2-15 | 3  | 4  | ARDAVVGSPGAHFY          | 15     | 14           | 0    | 0 | 3    | 0 | 2    | 0 | 4    | 0 | 2    | 3 |
| CVIDC31 IgG+ mem 24  | 3-9  | 6-13 | 3  | 4  | VKVDIPAAGTFED           | 14     | 21           | 2    | 0 | 4    | 0 | 1    | 1 | 1    | 3 | 5    | 4 |
| CVIDC31 IgG+ mem 33  | 4-31 | 5-5  | 2  | 4  | ARSTIHKYDRNGYIPLLWVNF   | 23     | 15           | 1    | 1 | 3    | 0 | 1    | 0 | 1    | 0 | 7    | 1 |
| CVIDC31 IgG+ mem 40  | 1-46 | /    | /  | 5  | TRDSRIQNWVDFP           | 12     | 7            | 0    | 0 | 2    | 0 | 2    | 0 | 0    | 1 | 2    | 0 |
| CVIDC31 IgG+ mem 48  | 4-59 | /    | /  | 2  | ARAGSDWYFDL             | 11     | 25           | 2    | 1 | 5    | 0 | 4    | 1 | 3    | 2 | 4    | 3 |
| CVIDC31 IgG+ mem 49  | 3-30 | /    | /  | 6  | AKALISAHYYYAMDV         | 15     | 9            | 0    | 0 | 3    | 0 | 1    | 0 | 1    | 1 | 3    | 0 |
| CVIDC31 IgG+ mem 60  | 1-18 | 3-9  | 3  | 5  | ARDLVMSDSGFDP           | 13     | 21           | 1    | 0 | 3    | 0 | 0    | 1 | 4    | 0 | 8    | 4 |
| CVIDC31 IgG+ mem 61  | 3-7  | 2-2  | 2  | 6  | AREGCSGTSCMDV           | 13     | 12           | 1    | 1 | 1    | 1 | 2    | 1 | 4    | 1 | 0    | 0 |
| CVIDC31 IgG+ mem 69  | 4-31 | 1-26 | 3  | 4  | ASGMAGKVGFADY           | 13     | 7            | 1    | 0 | 1    | 0 | 0    | 0 | 0    | 0 | 5    | 0 |
| CVIDC31 IgG+ mem 72  | 3-23 | 2-15 | 2  | 4  | AKGSLGRCSGVRVYHFDS      | 18     | 11           | 1    | 0 | 1    | 0 | 1    | 0 | 4    | 0 | 3    | 1 |
| CVIDC31 IgG+ mem 84  | 3-15 | 2-2  | 3  | 4  | TTDRPDIVVPAVIRIYRLGIDY  | 23     | 8            | 1    | 0 | 1    | 0 | 0    | 0 | 3    | 1 | 2    | 0 |
| CVIDC31 IgG+ mem 93  | 4-30 | /    | /  | 4  | ARDSGRAATDY             | 11     | 17           | 2    | 0 | 1    | 0 | 1    | 0 | 3    | 0 | 6    | 4 |
| CVIDC31 IgG+ mem 98  | 3-23 | 4-11 | 2  | 4  | AKDSDFHYSADFY           | 13     | 14           | 0    | 1 | 1    | 0 | 1    | 0 | 7    | 1 | 2    | 1 |
| CVIDC31 IgG+ mem 120 | 3-11 | /    | /  | 4  | ARGPGRY                 | 7      | 3            | 1    | 0 | 0    | 0 | 0    | 0 | 0    | 0 | 2    | 0 |
| CVIDC31 IgG+ mem 136 | 4-31 | 4-23 | 3  | 6  | ARDNTVVITSNYGMDV        | 16     | 9            | 3    | 0 | 0    | 0 | 1    | 1 | 2    | 0 | 1    | 1 |
| CVIDC31 IgG+ mem 138 | 3-73 | 3-16 | 3  | 5  | VEVIRDTFGGALES          | 14     | 20           | 4    | 1 | 0    | 0 | 3    | 0 | 3    | 0 | 6    | 3 |
| CVIDC31 IgG+ mem 139 | 4-31 | 3-3  | 2  | 6  | ARDRERFWSGYFYGGLDV      | 19     | 31           | 3    | 2 | 4    | 1 | 1    | 1 | 4    | 2 | 9    | 4 |
| CVIDC31 IgG+ mem 143 | 3-11 | /    | /  | 6  | ARAGEVEQPYYNYGMDV       | 18     | 12           | 0    | 1 | 0    | 0 | 1    | 0 | 4    | 0 | 5    | 1 |
| CVIDC31 IgG+ mem 149 | 3-9  | 2-15 | 2  | 6  | AKDRCSGGTCYSGMDV        | 16     | 10           | 1    | 2 | 0    | 1 | 1    | 0 | 0    | 1 | 2    | 2 |
| CVIDC31 IgG+ mem 160 | 1-2  | 6-13 | 3  | 6  | ARLNLRTLAAATNRDGLRYGLDV | 24     | 4            | 0    | 0 | 0    | 0 | 0    | 0 | 1    | 0 | 2    | 1 |
| CVIDC31 IgG+ mem 170 | 3-23 | 2-15 | 2  | 4  | AKGSLGRCSGVRVYHFDS      | 18     | 11           | 1    | 0 | 1    | 0 | 1    | 0 | 4    | 0 | 3    | 1 |
| CVIDC31 IgG+ mem 180 | 1-8  | 6-13 | 3  | 6  | ARESPRHMAAAGSYYYGMDV    | 20     | 7            | 0    | 0 | 0    | 0 | 2    | 0 | 0    | 1 | 4    | 0 |
| CVIDC31 IgG+ mem 185 | 3-48 | 2-2  | 3  | 6  | ARDRWDIVVPAAIYMDV       | 18     | 4            | 0    | 0 | 1    | 0 | 0    | 0 | 3    | 0 | 0    | 0 |

R, amino acid replacement mutation; S, silent mutation

**Table E3:** IgH repertoire and VH mutations of IgG+ memory B cells from CVIDY39

|                     |      |      |    |    |                     | Length | VH Mutations | FWR1 |   | CDR1 |   | FWR2 |   | CDR2 |   | FWR3 |   |
|---------------------|------|------|----|----|---------------------|--------|--------------|------|---|------|---|------|---|------|---|------|---|
|                     | VH   | D    | RF | JH | CDR3 (aa)           |        |              | R    | S | R    | S | R    | S | R    | S | R    | S |
| CVIDY39 IgG+ mem 49 | 3-15 | 3-22 | 2  | 5  | DGFGYYPNGFDP        | 12     | 16           | 1    | 0 | 1    | 3 | 0    | 0 | 3    | 0 | 4    | 4 |
| CVIDY39 IgG+ mem 51 | 3-30 | /    | /  | 6  | DPPNNEGFDDYDMDV     | 15     | 5            | 0    | 0 | 1    | 1 | 1    | 0 | 0    | 0 | 0    | 2 |
| CVIDY39 IgG+ mem 54 | 3-30 | 6-6  | 3  | 4  | AARTADRPSTYFDY      | 13     | 14           | 4    | 2 | 3    | 1 | 1    | 0 | 1    | 0 | 2    | 0 |
| CVIDY39 IgG+ mem 57 | 3-30 | 2-2  | 2  | 4  | CEGYCQVSGIDY        | 12     | 13           | 0    | 1 | 4    | 0 | 0    | 2 | 3    | 0 | 2    | 1 |
| CVIDY39 IgG+ mem 58 | 3-23 | 5-24 | 3  | 3  | EATWTTIDAFDI        | 12     | 5            | 0    | 0 | 1    | 0 | 1    | 0 | 2    | 0 | 1    | 0 |
| CVIDY39 IgG+ mem 61 | 3-33 | 3-22 | 2  | 4  | GPYYDDGGPLTDF       | 13     | 16           | 1    | 0 | 2    | 0 | 2    | 0 | 3    | 1 | 4    | 3 |
| CVIDY39 IgG+ mem 63 | 1-18 | /    | /  | 6  | DHSAYYESIDGPLRV     | 15     | 10           | 0    | 1 | 0    | 0 | 1    | 0 | 3    | 0 | 3    | 2 |
| CVIDY39 IgG+ mem 65 | 7-4  | 3-22 | 2  | 6  | DYYDYRAYGMDV        | 12     | 32           | 2    | 1 | 4    | 0 | 4    | 3 | 5    | 1 | 7    | 5 |
| CVIDY39 IgG+ mem 66 | 3-23 | 3-10 | 3  | 6  | VVIRGVDYYFQALDV     | 15     | 26           | 1    | 0 | 3    | 1 | 2    | 1 | 6    | 1 | 8    | 3 |
| CVIDY39 IgG+ mem 68 | 4-39 | 4-17 | 2  | 5  | QFDYANSPLQT         | 11     | 33           | 1    | 1 | 7    | 0 | 4    | 0 | 6    | 1 | 6    | 7 |
| CVIDY39 IgG+ mem 70 | 3-23 | 3-3  | 1  | 4  | IQFLEWLLLDY         | 11     | 8            | 0    | 1 | 1    | 1 | 1    | 0 | 1    | 1 | 0    | 2 |
| CVIDY39 IgG+ mem 71 | 4-31 | 3-3  | 3  | 2  | GRVVTNMGPYWYFDL     | 16     | 13           | 1    | 1 | 3    | 1 | 2    | 0 | 0    | 0 | 4    | 1 |
| CVIDY39 IgG+ mem 72 | 3-30 | 6-19 | 2  | 1  | DRGGYSSLTSYFQH      | 14     | 9            | 0    | 0 | 1    | 0 | 4    | 2 | 0    | 0 | 2    | 0 |
| CVIDY39 IgG+ mem 73 | 4-59 | /    | /  | 4  | HLGYDFHS            | 8      | 24           | 0    | 0 | 3    | 0 | 0    | 1 | 15   | 1 | 2    | 2 |
| CVIDY39 IgG+ mem 74 | 3-23 | /    | /  | 4  | DSSRYGRTGYFDY       | 13     | 8            | 0    | 1 | 2    | 0 | 2    | 1 | 0    | 0 | 1    | 1 |
| CVIDY39 IgG+ mem 82 | 3-23 | 3-10 | 3  | 4  | DRDIRLPYAVLRGVY     | 15     | 6            | 0    | 0 | 1    | 0 | 2    | 0 | 0    | 0 | 3    | 0 |
| CVIDY39 IgG+ mem 84 | 3-23 | /    | /  | 4  | RGGGTRLMVYDIHFFDY   | 17     | 17           | 2    | 0 | 2    | 0 | 3    | 1 | 5    | 0 | 2    | 2 |
| CVIDY39 IgG+ mem 85 | 5-51 | 3-22 | 2  | 4  | MQGYNNSSAFSYFDY     | 16     | 16           | 2    | 1 | 3    | 3 | 1    | 0 | 0    | 0 | 4    | 2 |
| CVIDY39 IgG+ mem 86 | 3-30 | 6-19 | 2  | 6  | DRDHYSSGWVGFYFYVMDV | 21     | 24           | 0    | 0 | 1    | 0 | 2    | 1 | 16   | 0 | 1    | 3 |
| CVIDY39 IgG+ mem 90 | 3-9  | 3-9  | 2  | 4  | DEDYWTGHSNTRFDQ     | 15     | 19           | 1    | 0 | 2    | 1 | 1    | 0 | 4    | 0 | 6    | 4 |
| CVIDY39 IgG+ mem 92 | 7-4  | /    | /  | 6  | GGPLQAYYDMDV        | 13     | 6            | 0    | 0 | 1    | 0 | 0    | 0 | 0    | 0 | 5    | 0 |
| CVIDY39 IgG+ mem 93 | 3-30 | /    | /  | 4  | SHSQYTPSDVYFDY      | 14     | 16           | 0    | 1 | 2    | 0 | 2    | 3 | 3    | 0 | 2    | 3 |
| CVIDY39 IgG+ mem 96 | 3-23 | 3-3  | 2  | 1  | VGYYYDSSGYPSSEYFQH  | 19     | 11           | 0    | 0 | 0    | 2 | 2    | 1 | 1    | 1 | 2    | 2 |

R, amino acid replacement mutation; S, silent mutation

**Table E4:** IgH repertoire and VH mutations of IgG+ memory B cells from 12A

|                 |      |      |    |    | CDR3 (aa)          | Length | VH Mutations | FWR1 |   | CDR1 |   | FWR2 |   | CDR2 |   | FWR3 |   |
|-----------------|------|------|----|----|--------------------|--------|--------------|------|---|------|---|------|---|------|---|------|---|
|                 | VH   | D    | RF | JH |                    |        |              | R    | S | R    | S | R    | S | R    | S | R    | S |
| 12A IgG+ mem 08 | 3-43 | 3-10 | 1  | 4  | DSTGGFGELYVPRRRFDY | 20     | 14           | 0    | 0 | 2    | 1 | 1    | 0 | 2    | 0 | 5    | 3 |
| 12A IgG+ mem 12 | 4-39 | 4-17 | 2  | 4  | HLSDYPVGY          | 9      | 20           | 0    | 0 | 2    | 3 | 1    | 0 | 6    | 0 | 4    | 4 |
| 12A IgG+ mem 19 | 4-59 | /    | /  | 4  | QEEGFDS            | 7      | 15           | 0    | 0 | 1    | 2 | 1    | 1 | 2    | 1 | 5    | 2 |
| 12A IgG+ mem 26 | 3-53 | 3-3  | 2  | 5  | ADGWSGYKAFDL       | 12     | 32           | 0    | 2 | 4    | 1 | 2    | 2 | 5    | 3 | 6    | 7 |
| 12A IgG+ mem 29 | 4-39 | 4-17 | 2  | 4  | RNLHGDYLFWHY       | 12     | 6            | 0    | 0 | 0    | 0 | 0    | 0 | 2    | 0 | 4    | 0 |
| 12A IgG+ mem 31 | 3-48 | /    | /  | 6  | DILADYYYGWDV       | 13     | 16           | 0    | 0 | 0    | 1 | 2    | 0 | 5    | 3 | 4    | 1 |
| 12A IgG+ mem 47 | 3-23 | 3-10 | 2  | 4  | EQFNAPLYLDH        | 12     | 16           | 0    | 1 | 0    | 0 | 4    | 0 | 6    | 1 | 2    | 2 |

R, amino acid replacement mutation; S, silent mutation

**Table E5:** IgH repertoire and VH mutations of IgG+ memory B cells from CVID170

|                     |      |      |    |    |                       |        | VH Mutations | FWR1 |   | CDR1 |   | FWR2 |   | CDR2 |   | FWR3 |   |
|---------------------|------|------|----|----|-----------------------|--------|--------------|------|---|------|---|------|---|------|---|------|---|
|                     | VH   | D    | RF | JH | CDR3 (aa)             | Length |              | R    | S | R    | S | R    | S | R    | S | R    | S |
| CVID170 IgG+ mem 04 | 3-30 | 2-8  | 2  | 4  | DLGYCTGGICRMSYFLY     | 17     | 15           | 0    | 0 | 1    | 1 | 3    | 0 | 2    | 1 | 3    | 4 |
| CVID170 IgG+ mem 05 | 3-21 | 6-6  | 2  | 6  | SEYSSSNHMDV           | 12     | 16           | 1    | 0 | 2    | 0 | 1    | 2 | 0    | 2 | 2    | 6 |
| CVID170 IgG+ mem 06 | 3-13 | 1-26 | 1  | 6  | GRLRWDV               | 7      | 18           | 1    | 1 | 0    | 2 | 3    | 0 | 2    | 0 | 6    | 3 |
| CVID170 IgG+ mem 07 | 3-7  | 2-8  | 2  | 4  | GSTGGAGY              | 8      | 1            | 0    | 0 | 0    | 0 | 1    | 0 | 0    | 0 | 0    | 0 |
| CVID170 IgG+ mem 09 | 3-23 | /    | /  | 4  | GGGAEFDY              | 8      | 13           | 0    | 1 | 2    | 1 | 0    | 0 | 4    | 1 | 3    | 1 |
| CVID170 IgG+ mem 11 | 3-23 | /    | /  | 4  | KKEVYESWGGRKSSFFDN    | 18     | 20           | 0    | 0 | 3    | 0 | 2    | 3 | 2    | 1 | 6    | 3 |
| CVID170 IgG+ mem 13 | 5-51 | /    | /  | 4  | RRGG                  | 4      | 11           | 2    | 1 | 4    | 0 | 2    | 0 | 1    | 1 | 0    | 0 |
| CVID170 IgG+ mem 14 | 3-21 | 3-3  | 2  | 4  | GGTRSGLSGVSGTMDY      | 16     | 30           | 0    | 0 | 3    | 1 | 2    | 0 | 7    | 4 | 8    | 5 |
| CVID170 IgG+ mem 15 | 1-3  | 1-20 | 2  | 4  | DEWNVLVFSY            | 10     | 4            | 0    | 0 | 2    | 0 | 0    | 0 | 0    | 0 | 2    | 0 |
| CVID170 IgG+ mem 16 | 3-7  | /    | /  | 4  | EHWFRIDY              | 8      | 34           | 0    | 0 | 2    | 3 | 5    | 0 | 6    | 1 | 10   | 7 |
| CVID170 IgG+ mem 18 | 5-51 | /    | /  | 6  | IFVGGMDV              | 8      | 12           | 0    | 0 | 2    | 0 | 2    | 0 | 0    | 0 | 5    | 3 |
| CVID170 IgG+ mem 22 | 5-51 | 6-19 | 2  | 6  | QAYSSGWSGDYYYYAMDV    | 18     | 16           | 1    | 0 | 4    | 1 | 2    | 2 | 2    | 0 | 3    | 1 |
| CVID170 IgG+ mem 23 | 3-48 | 3-22 | 2  | 3  | EDYDTSYWYDSTGYYPDAFDV | 21     | 19           | 0    | 0 | 0    | 0 | 1    | 2 | 4    | 4 | 6    | 2 |
| CVID170 IgG+ mem 25 | 1-2  | 6-6  | 3  | 4  | EGLKLAALPSYYFDY       | 15     | 9            | 0    | 0 | 1    | 0 | 2    | 0 | 0    | 0 | 3    | 3 |
| CVID170 IgG+ mem 27 | 3-23 | 4-17 | 2  | 4  | GGDYGEFDL             | 9      | 2            | 0    | 0 | 0    | 0 | 1    | 0 | 1    | 0 | 0    | 0 |
| CVID170 IgG+ mem 28 | 3-9  | 1-26 | 2  | 3  | TMSGTFTAADPFDV        | 14     | 18           | 3    | 0 | 4    | 0 | 0    | 2 | 2    | 1 | 6    | 0 |
| CVID170 IgG+ mem 32 | 5-51 | /    | /  | 4  | EATRGFYD              | 8      | 11           | 1    | 0 | 5    | 0 | 1    | 0 | 0    | 0 | 3    | 1 |
| CVID170 IgG+ mem 36 | 3-30 | 3-3  | 3  | 4  | VKTRVVTSGGFDLDY       | 15     | 5            | 0    | 0 | 1    | 0 | 1    | 0 | 1    | 0 | 2    | 0 |
| CVID170 IgG+ mem 37 | 3-23 | 5-12 | 3  | 5  | SRHGIVATTSYD          | 12     | 29           | 0    | 0 | 3    | 0 | 3    | 2 | 5    | 1 | 9    | 6 |
| CVID170 IgG+ mem 38 | 7-4  | 3-10 | 1  | 4  | DRRLLWFKEMGLADY       | 15     | 22           | 2    | 1 | 3    | 2 | 1    | 1 | 1    | 2 | 7    | 2 |
| CVID170 IgG+ mem 42 | 3-11 | /    | /  | 6  | SRDNFWGDYYYYSMDV      | 15     | 21           | 0    | 0 | 1    | 0 | 1    | 4 | 5    | 0 | 6    | 4 |
| CVID170 IgG+ mem 43 | 4-61 | 3-22 | 2  | 6  | DRKGTGYYYGMDV         | 13     | 34           | 3    | 1 | 2    | 2 | 3    | 2 | 1    | 2 | 11   | 7 |
| CVID170 IgG+ mem 45 | 4-30 | 6-6  | 2  | 4  | SGSSGNFDY             | 9      | 16           | 1    | 0 | 4    | 1 | 0    | 0 | 2    | 0 | 5    | 3 |
| CVID170 IgG+ mem 46 | 3-30 | 6-13 | 1  | 4  | DPGQQLFYFYD           | 12     | 5            | 0    | 0 | 0    | 0 | 1    | 0 | 2    | 0 | 1    | 1 |

R, amino acid replacement mutation; S, silent mutation



**Table E6:** IgH repertoire and VH mutations of IgG+ memory B cells from CVIDC63

|                     |      |      |    |    |                          | Length | VH Mutations | FWR1 |   | CDR1 |   | FWR2 |   | CDR2 |   | FWR3 |   |
|---------------------|------|------|----|----|--------------------------|--------|--------------|------|---|------|---|------|---|------|---|------|---|
|                     | VH   | D    | RF | JH | CDR3 (aa)                |        |              | R    | S | R    | S | R    | S | R    | S | R    | S |
| CVIDC63 IgG+ mem 02 | 4-4  | 3-10 | 2  | 4  | ASSRRLYGSLLENYYKDVDFAY   | 22     | 22           | 0    | 0 | 3    | 0 | 0    | 2 | 7    | 1 | 6    | 3 |
| CVIDC63 IgG+ mem 09 | 4-61 | 2-2  | 3  | 5  | ARESQDIVLVPALNWFDP       | 18     | 14           | 1    | 0 | 4    | 1 | 3    | 1 | 1    | 0 | 2    | 1 |
| CVIDC63 IgG+ mem 12 | 1-46 | 5-18 | 3  | 5  | ARDHSDTFIEGIARRGSWWFDP   | 22     | 31           | 2    | 1 | 6    | 0 | 4    | 1 | 6    | 0 | 10   | 1 |
| CVIDC63 IgG+ mem 14 | 1-2  | 1-1  | 2  | 4  | TRVVGQNYDNNWAEKFDY       | 18     | 15           | 2    | 0 | 2    | 0 | 1    | 0 | 2    | 0 | 6    | 2 |
| CVIDC63 IgG+ mem 15 | 4-59 | 3-9  | 2  | 6  | ASLPYDILPRGPQRFYHYGMDV   | 22     | 12           | 0    | 0 | 0    | 1 | 3    | 3 | 1    | 0 | 2    | 2 |
| CVIDC63 IgG+ mem 19 | 3-23 | 6-6  | 2  | 5  | AKGWGSSFGDWDFDP          | 14     | 12           | 1    | 0 | 2    | 0 | 0    | 0 | 5    | 1 | 2    | 1 |
| CVIDC63 IgG+ mem 20 | 1-2  | 3-9  | 3  | 5  | AREALRGLVNTFDP           | 14     | 14           | 2    | 2 | 1    | 1 | 1    | 1 | 1    | 0 | 4    | 1 |
| CVIDC63 IgG+ mem 28 | 1-8  | 5-18 | 2  | 4  | ARVGGYSYGGGIKY           | 14     | 0            | 0    | 0 | 0    | 0 | 0    | 0 | 0    | 0 | 0    | 0 |
| CVIDC63 IgG+ mem 33 | 4-61 | 3-16 | 2  | 4  | ARQAYAYVHWD              | 11     | 19           | 1    | 2 | 0    | 2 | 4    | 0 | 1    | 1 | 4    | 4 |
| CVIDC63 IgG+ mem 34 | 4-39 | /    | /  | 4  | AKEVAR                   | 6      | 36           | 4    | 1 | 4    | 1 | 4    | 2 | 6    | 1 | 7    | 6 |
| CVIDC63 IgG+ mem 37 | 3-15 | 3-22 | 2  | 4  | TTDPTGGYYFDSSGSYRDY      | 19     | 18           | 2    | 0 | 2    | 0 | 2    | 0 | 3    | 1 | 7    | 1 |
| CVIDC63 IgG+ mem 48 | 4-31 | 2-15 | 2  | 4  | ARDRYGGKWEVDS            | 13     | 25           | 2    | 2 | 3    | 0 | 4    | 1 | 4    | 0 | 5    | 4 |
| CVIDC63 IgG+ mem 52 | 3-33 | /    | /  | 6  | ARDQGWRRLLDYHYGFDV       | 18     | 5            | 0    | 0 | 1    | 0 | 1    | 0 | 1    | 0 | 2    | 0 |
| CVIDC63 IgG+ mem 63 | 4-59 | 1-26 | 2  | 4  | ARDSNGSYLDY              | 11     | 5            | 1    | 0 | 0    | 0 | 0    | 0 | 0    | 0 | 3    | 1 |
| CVIDC63 IgG+ mem 65 | 1-46 | /    | /  | 4  | AKDFFGHWITIDY            | 12     | 14           | 1    | 0 | 4    | 1 | 0    | 1 | 2    | 0 | 3    | 2 |
| CVIDC63 IgG+ mem 68 | 3-23 | 3-3  | 2  | 4  | AKDPYYDFWSGP             | 12     | 19           | 1    | 1 | 2    | 1 | 0    | 1 | 6    | 1 | 3    | 3 |
| CVIDC63 IgG+ mem 69 | 3-23 | 1-26 | 3  | 4  | AKDRIVGTIMGAWHY          | 15     | 9            | 0    | 1 | 1    | 0 | 1    | 0 | 1    | 0 | 1    | 4 |
| CVIDC63 IgG+ mem 70 | 1-2  | 3-22 | 2  | 4  | ATDHDSGYYFDY             | 12     | 22           | 1    | 0 | 4    | 0 | 1    | 1 | 2    | 0 | 11   | 2 |
| CVIDC63 IgG+ mem 71 | 4-39 | 3-22 | 2  | 5  | ARQSANYYDSGTHYLVDNWFDP   | 23     | 6            | 1    | 1 | 0    | 0 | 0    | 0 | 3    | 0 | 1    | 0 |
| CVIDC63 IgG+ mem 72 | 3-7  | 3-16 | 1  | 4  | ARDLYIGTYGGLGY           | 14     | 6            | 0    | 1 | 3    | 0 | 1    | 0 | 0    | 0 | 0    | 1 |
| CVIDC63 IgG+ mem 75 | 1-8  | 1-14 | 1  | 4  | ARGLPRTETWEPYFDN         | 17     | 5            | 0    | 0 | 0    | 0 | 0    | 0 | 1    | 2 | 2    | 0 |
| CVIDC63 IgG+ mem 81 | 3-7  | 2-21 | 2  | 4  | ARLGGRCHQGRDCYPYFDY      | 20     | 8            | 1    | 0 | 1    | 0 | 1    | 1 | 0    | 1 | 1    | 2 |
| CVIDC63 IgG+ mem 82 | 1-46 | 6-19 | 2  | 6  | ARDQKYSYGWYLEAIYYYYYGLDV | 25     | 4            | 0    | 0 | 1    | 0 | 0    | 0 | 1    | 0 | 1    | 1 |
| CVIDC63 IgG+ mem 87 | 3-20 | 1-1  | 3  | 4  | ARISLPPTAGAFDY           | 14     | 8            | 0    | 0 | 0    | 2 | 0    | 1 | 0    | 1 | 3    | 1 |
| CVIDC63 IgG+ mem 88 | 1-2  | 3-10 | 2  | 4  | ARPTNYDTSGLNY            | 15     | 15           | 2    | 1 | 0    | 1 | 2    | 0 | 1    | 0 | 5    | 3 |
| CVIDC63 IgG+ mem 95 | 3-30 | 6-19 | 3  | 4  | GKDLSGIAVAD              | 11     | 12           | 0    | 0 | 3    | 1 | 1    | 0 | 2    | 0 | 3    | 2 |

R, amino acid replacement mutation; S, silent mutation

**Table E7:** IgH repertoire and VH mutations of IgG+ memory B cells from CVIDY37

|                     |      |      |    |    |                         |        | FWR1         |   | CDR1 |   | FWR2 |   | CDR2 |   | FWR3 |    |   |
|---------------------|------|------|----|----|-------------------------|--------|--------------|---|------|---|------|---|------|---|------|----|---|
|                     | VH   | D    | RF | JH | CDR3 (aa)               | Length | VH Mutations | R | S    | R | S    | R | S    | R | S    | R  | S |
| CVIDY37 IgG+ mem 10 | 3-23 | 6-19 | 1  | 3  | GQQWPFDFFFI             | 11     | 16           | 0 | 1    | 2 | 2    | 2 | 0    | 1 | 0    | 4  | 4 |
| CVIDY37 IgG+ mem 11 | 4-59 | /    | /  | 5  | WDRGCFDP                | 8      | 22           | 0 | 0    | 3 | 2    | 2 | 4    | 1 | 1    | 7  | 2 |
| CVIDY37 IgG+ mem 12 | 3-23 | 2-21 | 2  | 5  | DQFGCGRPTCYDGIPYYLGN    | 20     | 24           | 0 | 1    | 3 | 1    | 2 | 1    | 4 | 3    | 5  | 4 |
| CVIDY37 IgG+ mem 13 | 4-31 | /    | /  | 6  | DVGGPGTYKGDYYYYGMDV     | 19     | 17           | 0 | 1    | 2 | 0    | 1 | 1    | 1 | 1    | 7  | 3 |
| CVIDY37 IgG+ mem 14 | 3-48 | 4-17 | 2  | 5  | DPFSDDDGDYLEFNWFDS      | 18     | 14           | 0 | 0    | 2 | 2    | 2 | 0    | 1 | 2    | 3  | 2 |
| CVIDY37 IgG+ mem 15 | 4-61 | 1-26 | 2  | 6  | SGWHILVAGRSYNYMDV       | 18     | 33           | 1 | 0    | 4 | 3    | 1 | 1    | 4 | 0    | 10 | 9 |
| CVIDY37 IgG+ mem 16 | 4-59 | 3-22 | 2  | 4  | TSYYDSISYFDY            | 13     | 20           | 1 | 0    | 2 | 0    | 2 | 1    | 1 | 1    | 7  | 5 |
| CVIDY37 IgG+ mem 18 | 3-30 | 5-5  | 3  | 4  | GGGRGPMVLWTLDY          | 14     | 4            | 0 | 0    | 0 | 0    | 1 | 1    | 0 | 0    | 2  | 0 |
| CVIDY37 IgG+ mem 21 | 3-11 | 3-3  | 2  | 4  | EHYDLLSGYYSWVGGGLGNYLDY | 23     | 9            | 0 | 1    | 0 | 0    | 2 | 1    | 1 | 0    | 3  | 1 |
| CVIDY37 IgG+ mem 22 | 1-18 | 3-3  | 1  | 5  | TPPRFFRWFD              | 11     | 31           | 0 | 0    | 1 | 2    | 5 | 2    | 3 | 3    | 10 | 5 |
| CVIDY37 IgG+ mem 23 | 3-21 | 3-10 | 2  | 3  | EIGYFGSESYSDAFDI        | 17     | 14           | 1 | 0    | 5 | 0    | 1 | 1    | 2 | 1    | 0  | 3 |
| CVIDY37 IgG+ mem 26 | 3-21 | 3-10 | 2  | 4  | DSVRGSGNYHHY            | 13     | 14           | 1 | 0    | 5 | 0    | 1 | 1    | 2 | 1    | 0  | 3 |
| CVIDY37 IgG+ mem 27 | 4-31 | 3-3  | 2  | 4  | VGYDFWSGWATYADY         | 15     | 20           | 0 | 0    | 4 | 0    | 1 | 1    | 3 | 0    | 6  | 5 |
| CVIDY37 IgG+ mem 28 | 3-30 | 6-19 | 2  | 4  | ELSSGWFFDY              | 10     | 7            | 0 | 0    | 0 | 1    | 1 | 0    | 2 | 0    | 3  | 0 |
| CVIDY37 IgG+ mem 29 | 3-30 | 1-20 | 3  | 4  | DLPLWITGTTLPETFDC       | 17     | 23           | 0 | 0    | 0 | 3    | 2 | 0    | 3 | 0    | 7  | 8 |
| CVIDY37 IgG+ mem 30 | 3-30 | 6-19 | 2  | 4  | ELNNSGWFEYFDA           | 14     | 16           | 0 | 0    | 1 | 0    | 0 | 1    | 2 | 0    | 7  | 5 |
| CVIDY37 IgG+ mem 31 | 4-4  | 3-10 | 3  | 5  | VLFGPGTLRGLMRK          | 15     | 24           | 1 | 2    | 1 | 2    | 2 | 1    | 1 | 0    | 7  | 7 |
| CVIDY37 IgG+ mem 35 | 1-69 | 6-19 | 3  | 4  | SGAVAGRGLDY             | 11     | 17           | 0 | 1    | 1 | 0    | 2 | 1    | 4 | 1    | 5  | 2 |

R, amino acid replacement mutation; S, silent mutation

**Table E8:** IgH repertoire and VH mutations of IgG+ memory B cells from CVIDC6

|                    |      |      |    |    |                          | Length | VH Mutations | FWR1 |   | CDR1 |   | FWR2 |   | CDR2 |   | FWR3 |   |
|--------------------|------|------|----|----|--------------------------|--------|--------------|------|---|------|---|------|---|------|---|------|---|
|                    | VH   | D    | RF | JH | CDR3 (aa)                |        |              | R    | S | R    | S | R    | S | R    | S | R    | S |
| CVIDC6 IgG+ mem 03 | 3-31 | 2-15 | 3  | 5  | RDPGVVAATR               | 10     | 8            | 0    | 1 | 3    | 0 | 1    | 0 | 1    | 0 | 1    | 1 |
| CVIDC6 IgG+ mem 04 | 1-69 | 3-10 | 2  | 6  | RVEGSGSYSTPYYYGMDV       | 19     | 1            | 1    | 0 | 0    | 0 | 0    | 0 | 0    | 0 | 0    | 0 |
| CVIDC6 IgG+ mem 06 | 4-34 | 2-15 | 2  | 5  | RGPGYCSGNCYSGWFD         | 18     | 6            | 1    | 0 | 1    | 0 | 1    | 0 | 0    | 0 | 1    | 2 |
| CVIDC6 IgG+ mem 07 | 3-30 | 6-13 | 1  | 6  | RDLELPQGYGLDV            | 14     | 5            | 0    | 0 | 0    | 0 | 1    | 0 | 1    | 1 | 1    | 1 |
| CVIDC6 IgG+ mem 08 | 3-48 | 6-19 | 2  | 4  | RDRFGGWQRFDY             | 12     | 3            | 2    | 0 | 0    | 1 | 0    | 0 | 0    | 0 | 0    | 0 |
| CVIDC6 IgG+ mem 11 | 4-34 | 3-3  | 3  | 6  | RGAPVTIFGVDSYYYGMDV      | 19     | 3            | 1    | 0 | 1    | 0 | 1    | 0 | 0    | 0 | 0    | 0 |
| CVIDC6 IgG+ mem 12 | 3-15 | 3-9  | 2  | 4  | RDRFGGWQRFDY             | 12     | 7            | 0    | 0 | 0    | 2 | 0    | 1 | 0    | 0 | 3    | 1 |
| CVIDC6 IgG+ mem 13 | 4-30 | 5-5  | 2  | 5  | RGAPVTIFGVDSYYYGMD       | 18     | 12           | 0    | 1 | 1    | 0 | 1    | 1 | 0    | 0 | 5    | 3 |
| CVIDC6 IgG+ mem 14 | 1-69 | 6-19 | 2  | 6  | TPTEYSNRPGGYYYGMDV       | 18     | 0            | 0    | 0 | 0    | 0 | 0    | 0 | 0    | 0 | 0    | 0 |
| CVIDC6 IgG+ mem 15 | 3-7  | /    | /  | 4  | RGGYRRGFDY               | 10     | 2            | 0    | 0 | 0    | 0 | 0    | 0 | 0    | 0 | 0    | 2 |
| CVIDC6 IgG+ mem 18 | 1-2  | 3-22 | 2  | 6  | RGGWDSSGYL RAGRGM        | 19     | 2            | 1    | 0 | 0    | 0 | 0    | 0 | 0    | 0 | 1    | 0 |
| CVIDC6 IgG+ mem 19 | 3-21 | /    | /  | 4  | REDVGSFDY                | 9      | 6            | 2    | 1 | 0    | 0 | 1    | 1 | 0    | 0 | 1    | 0 |
| CVIDC6 IgG+ mem 20 | 3-23 | /    | /  | 6  | KLSLTSGSPYYYGMDV         | 17     | 0            | 0    | 0 | 0    | 0 | 0    | 0 | 0    | 0 | 0    | 0 |
| CVIDC6 IgG+ mem 29 | 1-46 | 6-19 | 2  | 4  | GAGSGGY                  | 7      | 0            | 0    | 0 | 0    | 0 | 0    | 0 | 0    | 0 | 0    | 0 |
| CVIDC6 IgG+ mem 31 | 4-34 | /    | /  | 5  | RGYPTYNYDTS              | 12     | 10           | 0    | 1 | 1    | 1 | 0    | 1 | 0    | 0 | 4    | 2 |
| CVIDC6 IgG+ mem 32 | 3-30 | 2-21 | 2  | 4  | KDTVAYCGGDCYSGFDY        | 17     | 0            | 0    | 0 | 0    | 0 | 0    | 0 | 0    | 0 | 0    | 0 |
| CVIDC6 IgG+ mem 33 | 4-34 | 2-2  | 2  | 4  | RGSCSSTSCYRKVIVPFD       | 19     | 0            | 0    | 0 | 0    | 0 | 0    | 0 | 0    | 0 | 0    | 0 |
| CVIDC6 IgG+ mem 36 | 4-39 | 2-2  | 2  | 4  | GGNCSTTCYGYGSGSYIAY      | 21     | 4            | 0    | 0 | 1    | 0 | 0    | 0 | 1    | 0 | 0    | 2 |
| CVIDC6 IgG+ mem 38 | 1-3  | 7-27 | 1  | 4  | RGLLSKLGY                | 10     | 3            | 1    | 0 | 0    | 1 | 0    | 0 | 0    | 0 | 0    | 1 |
| CVIDC6 IgG+ mem 40 | 3-64 | 6-19 | 2  | 4  | KDIGWSMARFDY             | 12     | 8            | 2    | 0 | 0    | 0 | 0    | 0 | 3    | 0 | 2    | 1 |
| CVIDC6 IgG+ mem 43 | 3-33 | 6-19 | 2  | 4  | REGSGWYVDY               | 10     | 1            | 0    | 1 | 0    | 0 | 0    | 0 | 0    | 0 | 0    | 0 |
| CVIDC6 IgG+ mem 44 | 4-4  | 6-13 | 2  | 4  | RAKYSSSWFDY              | 11     | 12           | 3    | 1 | 0    | 1 | 0    | 4 | 0    | 3 | 0    | 0 |
| CVIDC6 IgG+ mem 45 | 4-39 | 1-26 | 3  | 4  | RLQGATLFDY               | 10     | 8            | 0    | 0 | 1    | 0 | 1    | 0 | 0    | 0 | 3    | 3 |
| CVIDC6 IgG+ mem 46 | 4-34 | 2-2  | 2  | 4  | RDCSSTSCRYFFDY           | 15     | 2            | 0    | 1 | 1    | 0 | 0    | 0 | 0    | 0 | 0    | 0 |
| CVIDC6 IgG+ mem 47 | 4-30 | 5-5  | 2  | 4  | RSGYSYGLRSGYSYGL         | 16     | 8            | 2    | 0 | 1    | 0 | 0    | 0 | 1    | 0 | 3    | 1 |
| CVIDC6 IgG+ mem 48 | 4-34 | 3-22 | 3  | 4  | RGGHKRIVAAHRFDY          | 17     | 5            | 0    | 1 | 1    | 0 | 0    | 0 | 0    | 1 | 2    | 0 |
| CVIDC6 IgG+ mem 49 | 4-30 | 3-22 | 2  | 4  | REHYDSSGYFFDY            | 14     | 6            | 1    | 1 | 1    | 0 | 0    | 0 | 1    | 0 | 1    | 1 |
| CVIDC6 IgG+ mem 51 | 4-39 | 3-16 | 1  | 5  | GCQTGWFGELLVSLAFDP       | 18     | 3            | 0    | 0 | 3    | 0 | 0    | 0 | 0    | 0 | 0    | 0 |
| CVIDC6 IgG+ mem 52 | 1-2  | 3-3  | 3  | 5  | RAHPRITIFGVVSSLTP        | 18     | 1            | 0    | 0 | 0    | 0 | 0    | 0 | 0    | 0 | 1    | 0 |
| CVIDC6 IgG+ mem 55 | 3-30 | 5-12 | 2  | 5  | RVKQRGYDGPYAF            | 13     | 0            | 0    | 0 | 0    | 0 | 0    | 0 | 0    | 0 | 0    | 0 |
| CVIDC6 IgG+ mem 61 | 4-61 | 6-13 | 3  | 4  | SSPRPGIAAAGTSLPVY        | 17     | 0            | 0    | 0 | 0    | 0 | 0    | 0 | 0    | 0 | 0    | 0 |
| CVIDC6 IgG+ mem 62 | 3-7  | 2-2  | 3  | 4  | RDPSNLVPAATFDY           | 14     | 9            | 0    | 1 | 2    | 2 | 0    | 1 | 2    | 0 | 1    | 0 |
| CVIDC6 IgG+ mem 63 | 4-34 | 5-24 | 2  | 4  | RGSGDGYNSHLGY            | 13     | 3            | 0    | 1 | 0    | 0 | 0    | 0 | 0    | 0 | 1    | 1 |
| CVIDC6 IgG+ mem 66 | 4-59 | 3-3  | 1  | 6  | GGGRFLEWPHYYYGMDV        | 17     | 11           | 2    | 1 | 1    | 0 | 0    | 2 | 1    | 0 | 2    | 2 |
| CVIDC6 IgG+ mem 67 | 4-34 | 6-19 | 3  | 4  | RGLPVAGDY                | 9      | 5            | 0    | 1 | 0    | 0 | 0    | 0 | 1    | 0 | 0    | 3 |
| CVIDC6 IgG+ mem 68 | 1-2  | 2-2  | 3  | 6  | REGHIVIPAASSPYYYYAMDV    | 22     | 3            | 0    | 0 | 0    | 0 | 0    | 0 | 1    | 0 | 1    | 1 |
| CVIDC6 IgG+ mem 69 | 1-18 | 2-2  | 3  | 6  | REMGIVVPAATHRRHPPLNLETP  | 24     | 0            | 0    | 0 | 0    | 0 | 0    | 0 | 0    | 0 | 0    | 0 |
| CVIDC6 IgG+ mem 70 | 3-33 | 5-12 | 3  | 2  | REATITITMSTQWYFDL        | 17     | 16           | 1    | 1 | 1    | 1 | 1    | 0 | 3    | 1 | 5    | 2 |
| CVIDC6 IgG+ mem 76 | 4-34 | 7-27 | 3  | 4  | RHRSTGEIYFDH             | 12     | 7            | 1    | 1 | 0    | 0 | 1    | 0 | 0    | 0 | 4    | 0 |
| CVIDC6 IgG+ mem 77 | 1-2  | 3-3  | 3  | 5  | RAHPRITIFGVVSSLTPAKNWFDP | 25     | 1            | 0    | 0 | 0    | 0 | 0    | 0 | 0    | 0 | 1    | 0 |
| CVIDC6 IgG+ mem 78 | 3-30 | 5-5  | 3  | 4  | RVFGGTAMVTDLDY           | 14     | 0            | 0    | 0 | 0    | 0 | 0    | 0 | 0    | 0 | 0    | 0 |
| CVIDC6 IgG+ mem 81 | 4-4  | 1-26 | 3  | 4  | RGGVRVGAGGFY             | 13     | 5            | 3    | 0 | 0    | 0 | 0    | 0 | 1    | 1 | 0    | 0 |
| CVIDC6 IgG+ mem 85 | 1-46 | 6-6  | 3  | 4  | RLGGPIAARPQSDY           | 14     | 1            | 1    | 0 | 0    | 0 | 0    | 0 | 0    | 0 | 0    | 0 |
| CVIDC6 IgG+ mem 87 | 4-39 | 2-15 | 2  | 5  | RLSGHCGGSCLNWFDP         | 16     | 6            | 0    | 0 | 0    | 0 | 0    | 0 | 1    | 0 | 3    | 2 |
| CVIDC6 IgG+ mem 89 | 3-30 | 5-5  | 3  | 4  | RVFGGTAMVTDLDY           | 14     | 0            | 0    | 0 | 0    | 0 | 0    | 0 | 0    | 0 | 0    | 0 |
| CVIDC6 IgG+ mem 90 | 4-59 | /    | /  | 5  | RVGGTFWFD                | 10     | 8            | 1    | 0 | 0    | 1 | 2    | 0 | 1    | 0 | 0    | 3 |
| CVIDC6 IgG+ mem 92 | 3-64 | 6-19 | 2  | 4  | KPHSSGWYGAFDY            | 13     | 4            | 0    | 0 | 0    | 0 | 1    | 0 | 2    | 1 | 0    | 0 |
| CVIDC6 IgG+ mem 96 | 4-31 | /    | /  | 3  | RDPLGPDAFDI              | 11     | 0            | 0    | 0 | 0    | 0 | 0    | 0 | 0    | 0 | 0    | 0 |

R, amino acid replacement mutation; S, silent mutation

**Table E9:** IgH repertoire and VH mutations of IgG+ memory B cells from CVID292

|                     |      |      |    |    |                        | Length | VH Mutations | FWR1 |   | CDR1 |   | FWR2 |   | CDR2 |   | FWR3 |   |
|---------------------|------|------|----|----|------------------------|--------|--------------|------|---|------|---|------|---|------|---|------|---|
|                     | VH   | D    | RF | JH | CDR3 (aa)              |        |              | R    | S | R    | S | R    | S | R    | S | R    | S |
| CVID292 IgG+ mem 04 | 3-48 | 3-22 | 3  | 4  | VSKDTTMMDDGFHI         | 14     | 19           | 0    | 0 | 5    | 2 | 2    | 2 | 0    | 2 | 1    | 5 |
| CVID292 IgG+ mem 06 | 3-23 | 3-22 | 2  | 4  | GDDSSGWGCFDY           | 12     | 17           | 2    | 0 | 1    | 0 | 1    | 1 | 3    | 1 | 4    | 4 |
| CVID292 IgG+ mem 09 | 4-59 | 3-3  | 2  | 4  | GLGTLYNSDFWSDPGYFDY    | 20     | 15           | 2    | 1 | 4    | 0 | 0    | 2 | 1    | 1 | 3    | 1 |
| CVID292 IgG+ mem 13 | 3-9  | 6-19 | 2  | 4  | DQDSSGWGEFDY           | 12     | 3            | 0    | 0 | 0    | 0 | 0    | 0 | 0    | 0 | 2    | 1 |
| CVID292 IgG+ mem 15 | 4-59 | 3-10 | 3  | 6  | LLLVRGVIPYYGMDN        | 16     | 21           | 2    | 0 | 0    | 0 | 1    | 2 | 3    | 2 | 6    | 5 |
| CVID292 IgG+ mem 16 | 3-23 | 5-5  | 2  | 4  | GYSYGYGWFDY            | 11     | 4            | 0    | 0 | 0    | 0 | 0    | 0 | 0    | 0 | 3    | 1 |
| CVID292 IgG+ mem 17 | 3-30 | 6-6  | 2  | 4  | SDSSSSSGSDY            | 11     | 2            | 0    | 0 | 0    | 0 | 1    | 0 | 0    | 0 | 0    | 1 |
| CVID292 IgG+ mem 18 | 3-21 | 2-15 | 2  | 4  | VPDCSGGSCYPRGYFDY      | 17     | 13           | 1    | 0 | 2    | 0 | 0    | 0 | 6    | 1 | 1    | 2 |
| CVID292 IgG+ mem 19 | 4-4  | /    | /  | 5  | VIRDSAVLEGLVGFDP       | 16     | 11           | 0    | 0 | 0    | 0 | 1    | 1 | 2    | 0 | 4    | 3 |
| CVID292 IgG+ mem 20 | 3-49 | 5-5  | 2  | 6  | DWHRYGYHHGMDV          | 13     | 11           | 0    | 0 | 1    | 2 | 1    | 1 | 3    | 2 | 1    | 0 |
| CVID292 IgG+ mem 22 | 3-21 | 3-3  | 2  | 4  | DAFNASAYNNFWSGYYENPFDY | 21     | 8            | 1    | 0 | 2    | 0 | 0    | 0 | 1    | 0 | 2    | 2 |
| CVID292 IgG+ mem 30 | 4-39 | /    | /  | 3  | RLIVGDDAFDI            | 11     | 11           | 0    | 0 | 0    | 0 | 1    | 0 | 3    | 0 | 3    | 4 |
| CVID292 IgG+ mem 33 | 4-39 | 5-5  | 2  | 2  | GGYSYKWKYFDL           | 12     | 7            | 0    | 0 | 2    | 0 | 0    | 0 | 1    | 0 | 3    | 1 |
| CVID292 IgG+ mem 34 | 4-34 | 1-1  | 2  | 6  | ARYEASNYNYNGMNV        | 15     | 21           | 2    | 0 | 1    | 1 | 2    | 2 | 3    | 1 | 6    | 3 |
| CVID292 IgG+ mem 35 | 4-59 | 3-9  | 2  | 2  | LGLHDILTGSFYWFFDL      | 18     | 22           | 1    | 0 | 3    | 0 | 4    | 2 | 2    | 1 | 6    | 3 |
| CVID292 IgG+ mem 41 | 4-39 | 2-2  | 1  | 6  | GPLTQQLPLPLDDMDV       | 17     | 7            | 0    | 0 | 0    | 0 | 0    | 0 | 3    | 0 | 3    | 1 |
| CVID292 IgG+ mem 42 | 1-69 | 4-17 | 2  | 4  | TADYGDASCDFD           | 12     | 7            | 1    | 0 | 1    | 0 | 0    | 0 | 1    | 0 | 3    | 1 |
| CVID292 IgG+ mem 44 | 4-34 | /    | /  | 6  | VARYYYMDV              | 9      | 8            | 0    | 0 | 0    | 0 | 2    | 0 | 1    | 1 | 2    | 2 |
| CVID292 IgG+ mem 45 | 3-15 | 5-12 | 2  | 4  | VAYSQYD                | 8      | 12           | 0    | 0 | 1    | 0 | 2    | 0 | 2    | 1 | 5    | 1 |
| CVID292 IgG+ mem 46 | 3-23 | 6-13 | 2  | 4  | PHSGDTSSWFLFALDS       | 16     | 15           | 2    | 1 | 1    | 0 | 2    | 1 | 4    | 0 | 2    | 2 |
| CVID292 IgG+ mem 47 | 3-15 | 3-16 | 2  | 4  | DTVAARV                | 7      | 4            | 0    | 1 | 0    | 0 | 0    | 0 | 0    | 0 | 3    | 0 |
| CVID292 IgG+ mem 49 | 4-59 | 5-5  | 2  | 4  | LSRGYSANDPKSALDY       | 16     | 9            | 0    | 0 | 2    | 0 | 0    | 1 | 2    | 0 | 3    | 1 |
| CVID292 IgG+ mem 50 | 4-59 | 6-13 | 2  | 5  | LGSSTWHWFDP            | 11     | 12           | 1    | 0 | 1    | 0 | 1    | 0 | 2    | 0 | 4    | 3 |
| CVID292 IgG+ mem 51 | 3-23 | 3-3  | 2  | 4  | DVGGDFWSPPLSDFDY       | 17     | 11           | 0    | 0 | 2    | 0 | 2    | 0 | 2    | 2 | 2    | 1 |
| CVID292 IgG+ mem 52 | 3-21 | 6-19 | 2  | 4  | GACSGFDCSDY            | 12     | 12           | 0    | 1 | 3    | 0 | 2    | 0 | 1    | 1 | 2    | 2 |
| CVID292 IgG+ mem 53 | 3-23 | 6-13 | 2  | 4  | PHSGDTSSWFLFALDS       | 16     | 12           | 0    | 0 | 1    | 0 | 2    | 1 | 3    | 1 | 2    | 2 |
| CVID292 IgG+ mem 55 | 3-23 | 2-8  | 2  | 3  | VLVGSYVGSAFDI          | 13     | 1            | 0    | 0 | 0    | 0 | 0    | 0 | 1    | 0 | 0    | 0 |
| CVID292 IgG+ mem 56 | 4-4  | 5-5  | 3  | 4  | DRVDTKPPYYFDY          | 13     | 12           | 1    | 0 | 1    | 0 | 0    | 1 | 2    | 1 | 5    | 1 |
| CVID292 IgG+ mem 58 | 4-4  | /    | /  | 5  | ASFGILNP               | 8      | 10           | 1    | 0 | 0    | 2 | 1    | 1 | 1    | 1 | 2    | 1 |
| CVID292 IgG+ mem 60 | 4-59 | 5-12 | 2  | 4  | GPFHGYSGYTYFDS         | 14     | 8            | 0    | 0 | 2    | 0 | 0    | 0 | 2    | 1 | 3    | 0 |
| CVID292 IgG+ mem 61 | 4-39 | /    | /  | 4  | RFYITSSFDY             | 10     | 19           | 0    | 0 | 4    | 0 | 0    | 2 | 3    | 1 | 6    | 3 |
| CVID292 IgG+ mem 62 | 4-59 | 5-5  | 2  | 4  | LRGGYSYGSLDY           | 13     | 6            | 0    | 0 | 2    | 2 | 0    | 1 | 1    | 0 | 0    | 0 |
| CVID292 IgG+ mem 63 | 4-61 | /    | /  | 6  | TPMGLTTSRGLYDYYYYDV    | 20     | 15           | 0    | 0 | 0    | 0 | 2    | 1 | 0    | 2 | 6    | 4 |
| CVID292 IgG+ mem 64 | 4-39 | 6-19 | 2  | 4  | AGGTHSAGYSRGFYD        | 15     | 9            | 1    | 0 | 1    | 0 | 1    | 1 | 0    | 0 | 2    | 3 |
| CVID292 IgG+ mem 66 | 4-59 | 4-17 | 3  | 5  | QTTVTVDWFDP            | 11     | 0            | 0    | 0 | 0    | 0 | 0    | 0 | 0    | 0 | 0    | 0 |
| CVID292 IgG+ mem 68 | 1-69 | 6-19 | 1  | 5  | AVLRLWQWPLSAPFDP       | 16     | 18           | 2    | 1 | 1    | 2 | 2    | 1 | 1    | 1 | 4    | 3 |
| CVID292 IgG+ mem 69 | 3-21 | 3-3  | 2  | 4  | SGYHIFDS               | 8      | 11           | 1    | 0 | 1    | 3 | 0    | 1 | 0    | 1 | 2    | 2 |
| CVID292 IgG+ mem 70 | 1-2  | 2-2  | 1  | 4  | GTSQLLFFDY             | 11     | 1            | 0    | 0 | 0    | 0 | 0    | 1 | 0    | 0 | 0    | 0 |
| CVID292 IgG+ mem 71 | 1-18 | /    | /  | 5  | VAAGDWFP               | 9      | 4            | 1    | 0 | 1    | 0 | 1    | 0 | 0    | 0 | 1    | 0 |
| CVID292 IgG+ mem 72 | 3-23 | 3-22 | 2  | 4  | DEWGGRGSGYLFDH         | 14     | 13           | 1    | 0 | 1    | 0 | 1    | 0 | 4    | 1 | 3    | 2 |
| CVID292 IgG+ mem 73 | 3-23 | 6-19 | 2  | 3  | DHALYSSGWYSAFDI        | 15     | 2            | 0    | 0 | 0    | 0 | 2    | 0 | 0    | 0 | 0    | 0 |
| CVID292 IgG+ mem 74 | 4-59 | 4-17 | 2  | 2  | RGFGDYGDFYWFYFDL       | 15     | 5            | 1    | 1 | 0    | 0 | 0    | 0 | 0    | 0 | 2    | 1 |
| CVID292 IgG+ mem 75 | 4-39 | 5-24 | 2  | 4  | DGVITSFDY              | 9      | 5            | 1    | 0 | 2    | 0 | 1    | 0 | 0    | 0 | 0    | 1 |

R, amino acid replacement mutation; S, silent mutation

**Table E10:** IgH repertoire and VH mutations of IgG+ memory B cells from CVIDY28

|                     |      |      |    |    |                      | Length | VH Mutations | FWR1 |   | CDR1 |   | FWR2 |   | CDR2 |   | FWR3 |   |
|---------------------|------|------|----|----|----------------------|--------|--------------|------|---|------|---|------|---|------|---|------|---|
|                     | VH   | D    | RF | JH | CDR3 (aa)            |        |              | R    | S | R    | S | R    | S | R    | S | R    | S |
| CVIDY28 IgG+ mem 49 | 4-34 | 3-10 | 2  | 6  | GFEVKYGGSGYYNSHYGLDV | 20     | 12           | 1    | 0 | 1    | 0 | 1    | 0 | 2    | 1 | 4    | 2 |
| CVIDY28 IgG+ mem 50 | 1-18 | 6-19 | 2  | 4  | RSSSGNLDY            | 9      | 8            | 0    | 1 | 0    | 1 | 0    | 2 | 1    | 3 | 0    | 0 |
| CVIDY28 IgG+ mem 51 | 4-59 | 3-3  | 2  | 4  | HGGRNYDFWSGFLSAFDY   | 18     | 9            | 1    | 0 | 2    | 0 | 0    | 1 | 0    | 2 | 2    | 1 |
| CVIDY28 IgG+ mem 53 | 3-9  | 6-19 | 2  | 1  | GSDTGTYRTAEYFHH      | 15     | 1            | 0    | 0 | 0    | 0 | 1    | 0 | 0    | 0 | 0    | 0 |
| CVIDY28 IgG+ mem 55 | 1-3  | 4-11 | 3  | 5  | DRTTVTTINWFDP        | 13     | 1            | 0    | 0 | 0    | 0 | 0    | 0 | 0    | 0 | 1    | 0 |
| CVIDY28 IgG+ mem 58 | 3-9  | 2-2  | 2  | 3  | ATCSSTSCLPLDAFDI     | 16     | 8            | 0    | 2 | 0    | 1 | 0    | 0 | 1    | 0 | 3    | 1 |
| CVIDY28 IgG+ mem 60 | 3-30 | 2-15 | 2  | 4  | DGRKYCSGGGCYSPDY     | 16     | 5            | 0    | 0 | 1    | 0 | 1    | 0 | 0    | 0 | 0    | 3 |
| CVIDY28 IgG+ mem 62 | 4-39 | /    | /  | 3  | RKAGRTAFDI           | 10     | 4            | 1    | 0 | 0    | 0 | 2    | 0 | 0    | 0 | 1    | 0 |
| CVIDY28 IgG+ mem 63 | 4-30 | 3-10 | 2  | 4  | RRRGYYLPGFDY         | 12     | 3            | 0    | 0 | 0    | 0 | 0    | 0 | 0    | 0 | 3    | 0 |
| CVIDY28 IgG+ mem 64 | 1-18 | 2-15 | 2  | 4  | DRYCSCGGTCYSSY       | 13     | 4            | 0    | 0 | 0    | 0 | 0    | 1 | 2    | 0 | 1    | 0 |
| CVIDY28 IgG+ mem 70 | 3-11 | 3-10 | 3  | 5  | DRGSIAVVRGVVISTWFDP  | 20     | 12           | 0    | 0 | 1    | 1 | 3    | 0 | 5    | 0 | 1    | 1 |
| CVIDY28 IgG+ mem 71 | 3-23 | 3-22 | 3  | 4  | DHRRIVVSATVEYFDY     | 16     | 3            | 0    | 0 | 1    | 0 | 1    | 0 | 0    | 0 | 1    | 0 |
| CVIDY28 IgG+ mem 74 | 4-31 | 5-12 | 1  | 4  | EGNGYDYNPFDF         | 12     | 17           | 0    | 0 | 2    | 0 | 4    | 1 | 2    | 0 | 4    | 4 |
| CVIDY28 IgG+ mem 78 | 3-30 | /    | /  | 6  | NRDSWYTGSDSWGYYGMDV  | 21     | 10           | 0    | 0 | 1    | 0 | 1    | 0 | 1    | 2 | 1    | 4 |
| CVIDY28 IgG+ mem 79 | 4-39 | 3-3  | 2  | 4  | HALATSYDVWSGYLVDN    | 17     | 20           | 0    | 0 | 3    | 1 | 2    | 2 | 0    | 1 | 5    | 6 |
| CVIDY28 IgG+ mem 81 | 3-15 | 3-3  | 1  | 4  | VLRFFEWVRGGSDN       | 14     | 14           | 0    | 0 | 1    | 0 | 2    | 0 | 3    | 2 | 5    | 1 |
| CVIDY28 IgG+ mem 82 | 4-59 | 5-12 | 2  | 4  | ADSGYDGDYFDY         | 11     | 16           | 0    | 1 | 1    | 0 | 2    | 1 | 6    | 0 | 4    | 1 |
| CVIDY28 IgG+ mem 84 | 3-30 | 3-9  | 1  | 4  | DRRRGYFDWLSIDY       | 14     | 3            | 0    | 0 | 0    | 0 | 0    | 0 | 1    | 0 | 1    | 1 |
| CVIDY28 IgG+ mem 85 | 3-53 | 1-14 | 3  | 4  | GITGNFDF             | 8      | 24           | 0    | 0 | 3    | 1 | 3    | 1 | 3    | 1 | 10   | 2 |
| CVIDY28 IgG+ mem 88 | 4-31 | /    | /  | 4  | EEAMTGDYFDY          | 11     | 1            | 0    | 0 | 0    | 0 | 0    | 0 | 0    | 0 | 0    | 1 |
| CVIDY28 IgG+ mem 91 | 1-3  | 4-11 | 3  | 5  | DRTTVTTINWFDP        | 13     | 0            | 0    | 0 | 0    | 0 | 0    | 0 | 0    | 0 | 0    | 0 |
| CVIDY28 IgG+ mem 92 | 1-46 | /    | /  | 4  | DAGMTGFGTIGLPDDY     | 16     | 9            | 1    | 0 | 0    | 2 | 0    | 0 | 1    | 0 | 2    | 3 |
| CVIDY28 IgG+ mem 95 | 3-15 | 6-19 | 2  | 4  | SGWTSKFDQ            | 9      | 4            | 1    | 1 | 0    | 0 | 0    | 0 | 0    | 0 | 1    | 1 |

R, amino acid replacement mutation; S, silent mutation

**Table E11:** IgH repertoire and VH mutations of IgG+ memory B cells from CVIDY43

|                     | VH   | D    | RF | JH | CDR3 (aa)               | Length | VH Mutations | FWR1 |   | CDR1 |   | FWR2 |   | CDR2 |   | FWR3 |   |
|---------------------|------|------|----|----|-------------------------|--------|--------------|------|---|------|---|------|---|------|---|------|---|
|                     |      |      |    |    |                         |        |              | R    | S | R    | S | R    | S | R    | S | R    | S |
| CVIDY43 IgG+ mem 01 | 3-21 | 3-22 | /  | 6  | DFHQWGTEFLTVVAKRYYYGMDV | 25     | 12           | 0    | 0 | 2    | 1 | 1    | 1 | 3    | 2 | 2    | 0 |
| CVIDY43 IgG+ mem 03 | 3-30 | 4-17 | /  | 6  | GFQYGDFVLWYYGVDV        | 16     | 3            | 0    | 0 | 0    | 0 | 0    | 0 | 1    | 0 | 2    | 0 |
| CVIDY43 IgG+ mem 07 | 4-59 | /    | /  | 3  | LSSDAFDI                | 9      | 10           | 0    | 0 | 0    | 0 | 1    | 2 | 1    | 0 | 3    | 3 |
| CVIDY43 IgG+ mem 10 | 1-69 | 3-22 | /  | 4  | DYHHYDNRGYSFLDY         | 15     | 10           | 0    | 0 | 3    | 1 | 1    | 0 | 2    | 0 | 1    | 2 |
| CVIDY43 IgG+ mem 11 | 3-23 | 6-19 | /  | 1  | DVDDQWLRPEYFHH          | 14     | 15           | 2    | 0 | 1    | 1 | 3    | 0 | 1    | 0 | 3    | 4 |
| CVIDY43 IgG+ mem 12 | 5-10 | 6-6  | 2  | 6  | HRAPGSSSPYYGMDV         | 16     | 1            | 0    | 0 | 1    | 0 | 0    | 0 | 0    | 0 | 0    | 0 |
| CVIDY43 IgG+ mem 13 | 4-31 | 3-22 | 3  | 3  | GDTMIVADDAFDI           | 14     | 4            | 0    | 0 | 2    | 0 | 0    | 0 | 0    | 1 | 1    | 0 |
| CVIDY43 IgG+ mem 14 | 4-34 | 3-10 | 2  | 1  | GFDYYGSGTYMRPWFYQY      | 19     | 19           | 1    | 2 | 0    | 1 | 1    | 3 | 3    | 0 | 4    | 4 |
| CVIDY43 IgG+ mem 16 | 3-30 | 4-17 | 2  | 6  | GRSPPHDSADYDSQNYYYGMDV  | 22     | 11           | 0    | 0 | 2    | 0 | 1    | 0 | 2    | 0 | 3    | 3 |
| CVIDY43 IgG+ mem 17 | 3-30 | 2-21 | 2  | 4  | DSRMWVNWSYCLGGVCYWDYFDY | 23     | 5            | 0    | 0 | 1    | 0 | 0    | 0 | 2    | 0 | 1    | 1 |
| CVIDY43 IgG+ mem 18 | 1-69 | 3-3  | 2  | 4  | GSWYYDFWSGSDAFDY        | 17     | 0            | 0    | 0 | 0    | 0 | 0    | 0 | 0    | 0 | 0    | 0 |
| CVIDY43 IgG+ mem 20 | 3-30 | 3-3  | 1  | 6  | ARLSTLLSPNYYYGMDV       | 18     | 2            | 0    | 0 | 0    | 0 | 1    | 0 | 0    | 0 | 0    | 1 |
| CVIDY43 IgG+ mem 21 | 3-23 | 3-3  | 3  | 6  | VQGVTMIFGVIIISDYYYGMDV  | 23     | 8            | 0    | 0 | 2    | 1 | 3    | 1 | 1    | 0 | 0    | 0 |
| CVIDY43 IgG+ mem 22 | 4-34 | 6-13 | 1  | 6  | DSREQQLVAGKHYYGLDV      | 21     | 6            | 0    | 0 | 0    | 1 | 0    | 1 | 0    | 0 | 0    | 4 |
| CVIDY43 IgG+ mem 23 | 4-39 | /    | /  | 5  | VVESSSLTGDWDFP          | 15     | 18           | 1    | 0 | 4    | 0 | 1    | 2 | 2    | 1 | 3    | 4 |
| CVIDY43 IgG+ mem 24 | 4-59 | /    | /  | 6  | LSGPLTGDYYYGMDV         | 16     | 10           | 0    | 1 | 2    | 0 | 0    | 0 | 2    | 0 | 2    | 3 |
| CVIDY43 IgG+ mem 25 | 3-7  | 6-19 | 2  | 4  | VRGSGWYGDY              | 10     | 3            | 1    | 0 | 0    | 0 | 1    | 0 | 0    | 0 | 1    | 0 |
| CVIDY43 IgG+ mem 27 | 1-69 | 2-2  | 2  | 6  | TYCSHTSCGYGLDV          | 15     | 11           | 0    | 0 | 3    | 0 | 0    | 1 | 1    | 0 | 3    | 3 |
| CVIDY43 IgG+ mem 28 | 3-73 | 3-3  | 2  | 5  | DLYDFLEAVAFDP           | 13     | 2            | 0    | 0 | 0    | 0 | 1    | 0 | 0    | 0 | 0    | 1 |
| CVIDY43 IgG+ mem 29 | 1-3  | 6-19 | 2  | 4  | VGSGWYQY                | 8      | 6            | 0    | 1 | 1    | 1 | 0    | 1 | 0    | 0 | 1    | 1 |
| CVIDY43 IgG+ mem 30 | 3-23 | 2-2  | 2  | 4  | RVYGCNTSCSVGSFDY        | 17     | 7            | 0    | 1 | 1    | 0 | 2    | 1 | 0    | 0 | 1    | 1 |
| CVIDY43 IgG+ mem 31 | 4-61 | 2-15 | 1  | 4  | DLLPHMGLDY              | 10     | 9            | 0    | 0 | 4    | 0 | 1    | 1 | 0    | 0 | 1    | 2 |
| CVIDY43 IgG+ mem 32 | 3-30 | 2-15 | 3  | 4  | EVAVVWFDY               | 10     | 9            | 0    | 0 | 2    | 0 | 1    | 3 | 1    | 0 | 1    | 1 |
| CVIDY43 IgG+ mem 34 | 3-23 | /    | /  | 3  | ENRIGDAFDI              | 10     | 25           | 1    | 0 | 6    | 0 | 0    | 1 | 6    | 4 | 5    | 2 |
| CVIDY43 IgG+ mem 35 | 4-39 | 5-24 | 2  | 4  | HRIGYNGYDY              | 10     | 4            | 0    | 1 | 1    | 0 | 1    | 0 | 0    | 0 | 1    | 0 |
| CVIDY43 IgG+ mem 36 | 1-69 | 3-10 | 2  | 6  | VITLEINYVRYYYAMDV       | 17     | 9            | 0    | 1 | 1    | 1 | 1    | 0 | 1    | 0 | 3    | 1 |
| CVIDY43 IgG+ mem 39 | 1-69 | /    | /  | 4  | GGRPNSPIYFDYWGQTLVTVSS  | 24     | 1            | 0    | 0 | 0    | 0 | 0    | 0 | 0    | 0 | 1    | 0 |
| CVIDY43 IgG+ mem 40 | 1-3  | 6-13 | 3  | 4  | SRAAALRPWDY             | 11     | 6            | 1    | 0 | 2    | 0 | 0    | 0 | 2    | 0 | 1    | 0 |
| CVIDY43 IgG+ mem 41 | 4-39 | 2-15 | 2  | 4  | ATPFHCSGGTCYDY          | 14     | 21           | 1    | 0 | 7    | 0 | 1    | 5 | 1    | 0 | 4    | 2 |
| CVIDY43 IgG+ mem 42 | 1-2  | /    | /  | 5  | VRQHLSNWFDP             | 11     | 7            | 0    | 1 | 0    | 0 | 1    | 2 | 0    | 0 | 2    | 1 |
| CVIDY43 IgG+ mem 43 | 4-59 | 3-3  | 2  | 6  | GTTKDYDFWSGYSSPYYYGMDV  | 22     | 12           | 0    | 0 | 0    | 1 | 1    | 1 | 2    | 1 | 3    | 3 |
| CVIDY43 IgG+ mem 44 | 3-48 | 3-10 | 3  | 4  | DDSLIQGVRY              | 10     | 3            | 1    | 0 | 0    | 0 | 0    | 0 | 1    | 0 | 1    | 0 |
| CVIDY43 IgG+ mem 45 | 1-69 | 2-8  | 2  | 2  | HYPPDSRYCTSGASCQNRVYFHL | 22     | 7            | 0    | 0 | 1    | 0 | 0    | 0 | 0    | 1 | 4    | 1 |
| CVIDY43 IgG+ mem 46 | 3-30 | 2-15 | 2  | 5  | GEGNYFDGSGTHF           | 13     | 14           | 0    | 0 | 1    | 0 | 2    | 0 | 2    | 1 | 7    | 1 |
| CVIDY43 IgG+ mem 47 | 4-34 | 2-15 | 3  | 6  | GRMPTGIVVVVAALRNYGVGMDV | 23     | 14           | 1    | 0 | 4    | 2 | 0    | 0 | 0    | 0 | 4    | 3 |

R, amino acid replacement mutation; S, silent mutation

**Table E12:** IgH repertoire and VH mutations of IgG+ memory B cells from CVIDY45

|                      |        |      |    |    |                        | Length | VH Mutations | FWR1 |   | CDR1 |   | FWR2 |   | CDR2 |   | FWR3 |   |
|----------------------|--------|------|----|----|------------------------|--------|--------------|------|---|------|---|------|---|------|---|------|---|
|                      | VH     | D    | RF | JH | CDR3 (aa)              |        |              | R    | S | R    | S | R    | S | R    | S | R    | S |
| CVID Y45 IgG+ mem 03 | 1-69   | 2-2  | 2  | 6  | EFYSLGYCSSSSCRPGYGMDV  | 21     | 3            | 0    | 0 | 1    | 0 | 0    | 0 | 0    | 0 | 1    | 1 |
| CVID Y45 IgG+ mem 05 | 3-30   | 2-21 | 2  | 4  | VNCGGDCYSRDYFDY        | 15     | 2            | 0    | 0 | 0    | 0 | 0    | 0 | 0    | 0 | 0    | 2 |
| CVID Y45 IgG+ mem 06 | 3-64D  | 5-24 | 1  | 4  | HERWLQLGAY             | 10     | 5            | 0    | 0 | 0    | 0 | 2    | 0 | 2    | 0 | 0    | 1 |
| CVID Y45 IgG+ mem 09 | 4-59   | 3-22 | 2  | 4  | SRGYDGSVFDY            | 11     | 5            | 0    | 0 | 1    | 1 | 2    | 0 | 0    | 0 | 1    | 0 |
| CVID Y45 IgG+ mem 11 | 1-69   | 3-22 | 2  | 3  | EGGHYYGRSGYSAFDI       | 16     | 11           | 2    | 0 | 1    | 1 | 0    | 0 | 0    | 0 | 2    | 5 |
| CVID Y45 IgG+ mem 13 | 4-30   | 2-8  | 2  | 4  | ALRYCTNDVCFGYFDY       | 16     | 6            | 0    | 0 | 1    | 0 | 1    | 3 | 0    | 1 | 0    | 0 |
| CVID Y45 IgG+ mem 15 | 3-30-3 | 5-12 | /  | 4  | GLWITIDY               | 7      | 4            | 0    | 0 | 1    | 0 | 1    | 0 | 0    | 0 | 1    | 1 |
| CVID Y45 IgG+ mem 16 | 4-39   | 6-19 | 2  | 4  | HDMVGSWGWSRFDY         | 14     | 8            | 1    | 0 | 1    | 1 | 0    | 0 | 1    | 0 | 3    | 1 |
| CVID Y45 IgG+ mem 17 | 3-53   | 3-22 | 2  | 4  | EGLDSSGYHYFDY          | 13     | 2            | 0    | 0 | 0    | 0 | 0    | 0 | 1    | 0 | 0    | 1 |
| CVID Y45 IgG+ mem 19 | 4-59   | 4-23 | 2  | 4  | GDWTYGGLFDY            | 11     | 4            | 0    | 0 | 2    | 0 | 0    | 2 | 0    | 0 | 0    | 0 |
| CVID Y45 IgG+ mem 20 | 4-59   | 2-21 | 2  | 4  | APQAYCGGDCYFYFDY       | 15     | 1            | 0    | 0 | 1    | 0 | 0    | 0 | 0    | 0 | 0    | 0 |
| CVID Y45 IgG+ mem 21 | 1-69   | 2-15 | 3  | 5  | CIALAATPFES            | 11     | 5            | 0    | 0 | 0    | 0 | 0    | 0 | 1    | 0 | 1    | 3 |
| CVID Y45 IgG+ mem 22 | 1-18   | 4-11 | 3  | 5  | DSTVTPVDNWFDP          | 13     | 0            | 0    | 0 | 0    | 0 | 0    | 0 | 0    | 0 | 0    | 0 |
| CVID Y45 IgG+ mem 26 | 1-18   | 2-2  | 2  | 1  | SSSRHCSSTSCYANEYFQH    | 19     | 1            | 0    | 0 | 0    | 0 | 0    | 0 | 0    | 0 | 0    | 1 |
| CVID Y45 IgG+ mem 29 | 4-39   | 6-6  | 3  | 4  | HIAADYFDY              | 9      | 1            | 1    | 0 | 0    | 0 | 0    | 0 | 0    | 0 | 0    | 0 |
| CVID Y45 IgG+ mem 31 | 4-4    | 6-19 | /  | 4  | EGSGANPRFDF            | 11     | 4            | 0    | 0 | 0    | 0 | 0    | 0 | 0    | 0 | 3    | 1 |
| CVID Y45 IgG+ mem 33 | 1-69   | 3-3  | 3  | 3  | ALRITIFGVVRQKSAFDI     | 18     | 0            | 0    | 0 | 0    | 0 | 0    | 0 | 0    | 0 | 0    | 0 |
| CVID Y45 IgG+ mem 35 | 4-30-4 | 3-9  | 2  | 4  | VAPFHYDILKESGNLIFYD    | 19     | 0            | 0    | 0 | 0    | 0 | 0    | 0 | 0    | 0 | 0    | 0 |
| CVID Y45 IgG+ mem 36 | 3-64D  | 6-19 | 3  | 4  | GIAVSGSPTRHRPPGDY      | 17     | 1            | 0    | 0 | 0    | 0 | 0    | 0 | 1    | 0 | 0    | 0 |
| CVID Y45 IgG+ mem 37 | 4-61   | 3-3  | 2  | 4  | GEADYDFWWSGYFSRGGAFDY  | 21     | 2            | 0    | 0 | 0    | 0 | 1    | 0 | 0    | 1 | 0    | 0 |
| CVID Y45 IgG+ mem 38 | 4-59   | 2-2  | /  | 6  | EVIGYSAASGDFSFYGMVDV   | 20     | 14           | 1    | 1 | 3    | 0 | 0    | 2 | 0    | 1 | 5    | 1 |
| CVID Y45 IgG+ mem 40 | 4-34   | 6-19 | 1  | 4  | GWSEQLWIWSYFDY         | 15     | 11           | 0    | 0 | 2    | 1 | 1    | 1 | 1    | 0 | 4    | 1 |
| CVID Y45 IgG+ mem 45 | 3-30-3 | 3-22 | 3  | 6  | DESIVVLKYYGMVDV        | 15     | 2            | 0    | 0 | 0    | 0 | 1    | 0 | 0    | 0 | 1    | 0 |
| CVID Y45 IgG+ mem 46 | 3-21   | 3-3  | /  | 6  | DQSSPGFFYYGMVDV        | 15     | 4            | 0    | 0 | 2    | 0 | 0    | 0 | 0    | 0 | 2    | 0 |
| CVID Y45 IgG+ mem 48 | 4-34   | 5-12 | /  | 2  | GPRYERPTWYFDL          | 13     | 6            | 0    | 0 | 1    | 0 | 0    | 1 | 0    | 0 | 2    | 2 |
| CVID Y45 IgG+ mem 50 | 1-69   | 3-3  | 2  | 6  | GSRGFWSYSSYYLYYYYDMDV  | 20     | 3            | 1    | 0 | 0    | 0 | 0    | 0 | 1    | 0 | 0    | 1 |
| CVID Y45 IgG+ mem 51 | 1-69   | 3-3  | 3  | 3  | ALRITIFGVVRQKSAFDI     | 18     | 1            | 1    | 0 | 0    | 0 | 0    | 0 | 0    | 0 | 0    | 0 |
| CVID Y45 IgG+ mem 52 | 4-34   | 4-23 | 3  | 1  | GCGVTPCHFQH            | 11     | 3            | 0    | 0 | 1    | 0 | 0    | 0 | 1    | 0 | 1    | 0 |
| CVID Y45 IgG+ mem 54 | 1-69   | 2-21 | 3  | 6  | DLVVTATYGMVDV          | 12     | 9            | 1    | 0 | 2    | 0 | 0    | 0 | 1    | 0 | 4    | 1 |
| CVID Y45 IgG+ mem 55 | 1-69   | 3-3  | 3  | 3  | GLRITIFGVVRQKSAFDI     | 18     | 0            | 0    | 0 | 0    | 0 | 0    | 0 | 0    | 0 | 0    | 0 |
| CVID Y45 IgG+ mem 56 | 4-59   | 5-12 | 1  | 4  | DKGDRWLRFDFY           | 12     | 4            | 0    | 0 | 2    | 0 | 1    | 0 | 0    | 0 | 0    | 1 |
| CVID Y45 IgG+ mem 57 | 3-30-3 | 5-24 | /  | 4  | DDGGSGGWVWSPFDY        | 15     | 6            | 0    | 0 | 2    | 0 | 2    | 0 | 0    | 0 | 2    | 0 |
| CVID Y45 IgG+ mem 60 | 3-21   | 2-2  | 2  | 4  | RRDPGYCSSTSCYVFDY      | 17     | 0            | 0    | 0 | 0    | 0 | 0    | 0 | 0    | 0 | 0    | 0 |
| CVID Y45 IgG+ mem 61 | 4-34   | 1-7  | /  | 5  | GNWHWFDP               | 8      | 5            | 0    | 0 | 1    | 0 | 0    | 0 | 0    | 0 | 2    | 2 |
| CVID Y45 IgG+ mem 62 | 3-23   | 4-17 | 2  | 4  | DPNGYDALPPHFDY         | 14     | 7            | 1    | 0 | 0    | 1 | 1    | 0 | 1    | 0 | 2    | 1 |
| CVID Y45 IgG+ mem 64 | 1-46   | 5-12 | /  | 6  | DLYSLVLGHYYYAPDV       | 17     | 12           | 1    | 2 | 1    | 1 | 1    | 0 | 0    | 2 | 2    | 2 |
| CVID Y45 IgG+ mem 66 | 4-39   | 6-6  | 2  | 6  | TYSSLPHGMVDV           | 11     | 3            | 3    | 0 | 0    | 0 | 0    | 0 | 0    | 0 | 0    | 0 |
| CVID Y45 IgG+ mem 67 | 3-21   | 6-13 | 2  | 4  | EGDSSSWPPPWPY          | 13     | 0            | 0    | 0 | 0    | 0 | 0    | 0 | 0    | 0 | 0    | 0 |
| CVID Y45 IgG+ mem 69 | 3-23   | 4-23 | 3  | 5  | IPFPTVANHMYNWFDP       | 17     | 3            | 0    | 0 | 0    | 0 | 1    | 1 | 1    | 0 | 0    | 0 |
| CVID Y45 IgG+ mem 70 | 4-30-2 | 6-13 |    | 4  | GLGHFDY                | 7      | 12           | 5    | 0 | 1    | 0 | 1    | 1 | 0    | 0 | 3    | 1 |
| CVID Y45 IgG+ mem 71 | 3-21   | 1-26 | 3  | 6  | AVGATEEVKYYYGMVDV      | 17     | 1            | 0    | 0 | 0    | 0 | 1    | 0 | 0    | 0 | 0    | 0 |
| CVID Y45 IgG+ mem 72 | 1-69   | 3-22 | 2  | 6  | EGATYYDSSGYLASVYYGMVDV | 22     | 6            | 2    | 0 | 1    | 0 | 0    | 0 | 0    | 0 | 3    | 0 |
| CVID Y45 IgG+ mem 77 | 4-34   | 1-7  | /  | 5  | ISERAALTHSGWGFDP       | 17     | 9            | 0    | 0 | 0    | 0 | 1    | 1 | 0    | 0 | 5    | 2 |
| CVID Y45 IgG+ mem 78 | 3-15   | 3-9  | 1  | 4  | VVRYFDLGAIFYD          | 14     | 1            | 0    | 0 | 1    | 0 | 0    | 0 | 0    | 0 | 0    | 0 |
| CVID Y45 IgG+ mem 84 | 1-18   | 6-6  | 1  | 4  | DVELVRAPIFDY           | 12     | 5            | 0    | 0 | 1    | 2 | 0    | 0 | 0    | 0 | 1    | 1 |
| CVID Y45 IgG+ mem 86 | 3-23   | 6-19 | /  | 4  | WPGWLEYFDF             | 10     | 8            | 0    | 0 | 0    | 0 | 2    | 0 | 2    | 0 | 2    | 2 |
| CVID Y45 IgG+ mem 90 | 1-69   | 6-19 | 1  | 5  | DRSRQWPWFDP            | 12     | 1            | 1    | 0 | 0    | 0 | 0    | 0 | 0    | 0 | 0    | 0 |
| CVID Y45 IgG+ mem 91 | 1-69   | 3-16 | 1  | 4  | GMDLGELSLGDY           | 12     | 5            | 2    | 1 | 0    | 0 | 0    | 0 | 0    | 0 | 2    | 0 |
| CVID Y45 IgG+ mem 92 | 3-33   | 3-10 | 2  | 4  | DIPKGLSGSVDY           | 13     | 5            | 0    | 0 | 1    | 0 | 1    | 0 | 0    | 1 | 1    | 1 |
| CVID Y45 IgG+ mem 94 | 1-69   | 3-10 | 2  | 4  | GYYGSGSYGSFDY          | 13     | 12           | 2    | 0 | 1    | 0 | 2    | 0 | 2    | 0 | 3    | 2 |

R, amino acid replacement mutation; S, silent mutation

**Table E13:** IgH repertoire and VH mutations of IgG+ memory B cells from CVIDMS1

|                     |        |      |    |    |                      | Length | VH Mutations | FWR1 |   | CDR1 |   | FWR2 |   | CDR2 |   | FWR3 |   |
|---------------------|--------|------|----|----|----------------------|--------|--------------|------|---|------|---|------|---|------|---|------|---|
|                     | VH     | D    | RF | JH | CDR3 (aa)            |        |              | R    | S | R    | S | R    | S | R    | S | R    | S |
| CVIDMS1 IgG+ mem 02 | 1-3    | 4-11 | 3  | 5  | DRTTVTINWFDP         | 13     | 2            | 1    | 0 | 1    | 0 | 0    | 0 | 0    | 0 | 0    | 0 |
| CVIDMS1 IgG+ mem 05 | 3-30-3 | 3-22 | 2  | 4  | DLDRTAGYYDSSGYRNVGY  | 20     | 4            | 0    | 0 | 0    | 0 | 1    | 0 | 1    | 1 | 1    | 0 |
| CVIDMS1 IgG+ mem 08 | 3-33   | 3-22 | 2  | 5  | DLNYDSEPPIN          | 11     | 4            | 0    | 0 | 1    | 0 | 1    | 0 | 0    | 0 | 1    | 1 |
| CVIDMS1 IgG+ mem 09 | 4-30-4 | 2-15 | 2  | 5  | GPKTYCSGGSCYFGWFDP   | 18     | 3            | 0    | 0 | 1    | 0 | 0    | 0 | 0    | 0 | 1    | 1 |
| CVIDMS1 IgG+ mem 10 | 1-18   | 2-15 | 2  | 4  | GPADCSRGACYFTSYFDY   | 18     | 12           | 0    | 0 | 1    | 1 | 2    | 0 | 5    | 1 | 0    | 2 |
| CVIDMS1 IgG+ mem 11 | 3-66   | 2-21 | 2  | 4  | IRGGGGDCYRCFDY       | 14     | 1            | 0    | 0 | 0    | 0 | 0    | 1 | 0    | 0 | 0    | 0 |
| CVIDMS1 IgG+ mem 16 | 3-23   | 3-10 | 2  | 4  | VGYNIDPQLYYFDY       | 15     | 17           | 1    | 0 | 1    | 4 | 3    | 1 | 2    | 1 | 1    | 3 |
| CVIDMS1 IgG+ mem 17 | 3-33   | 6-19 | 2  | 4  | DLSSGWYIDY           | 10     | 5            | 0    | 0 | 1    | 1 | 0    | 0 | 0    | 0 | 2    | 1 |
| CVIDMS1 IgG+ mem 18 | 3-15   | 3-16 | 3  | 4  | SLRMITFGGLIVPPFDY    | 17     | 10           | 0    | 0 | 2    | 0 | 1    | 1 | 2    | 0 | 1    | 3 |
| CVIDMS1 IgG+ mem 19 | 3-23   | 3-22 | 2  | 4  | WRTDYDSAGYGDYFDY     | 17     | 17           | 1    | 0 | 2    | 1 | 2    | 1 | 0    | 2 | 3    | 5 |
| CVIDMS1 IgG+ mem 27 | 3-33   | 1-7  | 1  | 6  | VPGLWELSEKYMVDV      | 14     | 7            | 0    | 0 | 0    | 0 | 1    | 0 | 2    | 0 | 3    | 1 |
| CVIDMS1 IgG+ mem 28 | 3-23   | 3-22 | 2  | 4  | DRNEYDFDSSGYISAADY   | 18     | 7            | 0    | 0 | 1    | 0 | 2    | 0 | 1    | 0 | 2    | 1 |
| CVIDMS1 IgG+ mem 32 | 3-30-3 | 1-26 | 3  | 4  | CRAKTRVGADRFDY       | 14     | 4            | 0    | 0 | 0    | 0 | 0    | 0 | 1    | 1 | 1    | 1 |
| CVIDMS1 IgG+ mem 33 | 4-61   | 3-3  | 2  | 2  | GHYDADYYGMDV         | 12     | 3            | 0    | 0 | 0    | 1 | 0    | 0 | 1    | 0 | 0    | 1 |
| CVIDMS1 IgG+ mem 34 | 4-59   | /    | /  | 5  | HGTFGWFDP            | 10     | 9            | 1    | 0 | 0    | 2 | 0    | 0 | 1    | 0 | 2    | 3 |
| CVIDMS1 IgG+ mem 35 | 3-73   | /    | /  | 6  | QREDDAGYYYYYMDV      | 15     | 11           | 0    | 0 | 0    | 0 | 1    | 0 | 3    | 1 | 4    | 2 |
| CVIDMS1 IgG+ mem 39 | 3-15   | 6-19 | 2  | 4  | ERYSSLEDY            | 9      | 7            | 0    | 0 | 2    | 0 | 1    | 0 | 0    | 1 | 1    | 2 |
| CVIDMS1 IgG+ mem 42 | 4-61   | 3-22 | 2  | 2  | GSRVDHYDSSGYQKDWYFDL | 20     | 9            | 0    | 0 | 1    | 0 | 0    | 0 | 3    | 1 | 2    | 2 |
| CVIDMS1 IgG+ mem 43 | 4-59   | 2-8  | 2  | 3  | SPEYGVPFGAFDI        | 13     | 10           | 0    | 0 | 3    | 0 | 0    | 0 | 1    | 0 | 6    | 0 |
| CVIDMS1 IgG+ mem 45 | 3-23   | /    | /  | 4  | GYFDSLKGKYSY         | 13     | 8            | 0    | 0 | 1    | 0 | 1    | 0 | 3    | 0 | 2    | 1 |
| CVIDMS1 IgG+ mem 46 | 4-39   | 3-3  | 3  | 6  | QETTIFGVVITHYHYGMDV  | 21     | 4            | 0    | 0 | 2    | 0 | 0    | 0 | 0    | 0 | 2    | 0 |
| CVIDMS1 IgG+ mem 51 | 3-30   | 3-3  | 2  | 4  | IREGGYDFWSGIDY       | 14     | 2            | 0    | 0 | 0    | 0 | 0    | 0 | 1    | 0 | 1    | 0 |
| CVIDMS1 IgG+ mem 54 | 3-15   | 3-3  | 2  | 4  | GDFWWSGNRNFHDH       | 13     | 9            | 1    | 1 | 0    | 0 | 0    | 1 | 1    | 0 | 3    | 2 |
| CVIDMS1 IgG+ mem 55 | 3-15   | 6-19 | 3  | 4  | DGIEVAGNGVGFYD       | 14     | 15           | 0    | 0 | 2    | 0 | 0    | 3 | 2    | 0 | 6    | 2 |
| CVIDMS1 IgG+ mem 58 | 1-18   | 3-22 | 2  | 4  | VSDRYDTSVYYWAGDY     | 17     | 2            | 0    | 0 | 1    | 0 | 0    | 0 | 0    | 0 | 0    | 1 |
| CVIDMS1 IgG+ mem 59 | 3-33   | 6-19 | 2  | 4  | DAEAYISGWYGNFDY      | 15     | 5            | 0    | 0 | 1    | 0 | 1    | 0 | 1    | 0 | 1    | 1 |
| CVIDMS1 IgG+ mem 60 | 4-59   | 3-16 | 3  | 4  | FTFGEMWYDY           | 10     | 10           | 1    | 0 | 2    | 0 | 0    | 1 | 0    | 0 | 3    | 3 |
| CVIDMS1 IgG+ mem 61 | 4-59   | 3-10 | 1  | 6  | HQLWPRYYYYYMDV       | 15     | 4            | 0    | 0 | 1    | 0 | 1    | 0 | 2    | 0 | 0    | 0 |
| CVIDMS1 IgG+ mem 62 | 3-49   | 5-12 | 2  | 4  | GGYGSFDWEVDF         | 13     | 14           | 1    | 1 | 0    | 0 | 1    | 2 | 3    | 1 | 4    | 1 |
| CVIDMS1 IgG+ mem 63 | 4-61   | 5-12 | 2  | 6  | GLYSGYDWPPTVGMDV     | 16     | 1            | 0    | 0 | 0    | 0 | 0    | 0 | 0    | 0 | 0    | 1 |
| CVIDMS1 IgG+ mem 64 | 3-33   | 6-19 | 2  | 3  | DRHSSGWDADFID        | 12     | 5            | 0    | 0 | 2    | 0 | 0    | 0 | 1    | 0 | 1    | 1 |
| CVIDMS1 IgG+ mem 65 | 3-23   | 3-22 | 2  | 5  | PYYDSSDYNGY          | 13     | 13           | 0    | 0 | 3    | 0 | 1    | 2 | 2    | 0 | 2    | 3 |
| CVIDMS1 IgG+ mem 67 | 3-53   | 2-21 | 3  | 4  | QVHIPMVTGFDF         | 12     | 29           | 1    | 1 | 1    | 2 | 4    | 1 | 2    | 2 | 8    | 7 |
| CVIDMS1 IgG+ mem 74 | 4-61   | 6-19 | /  | 5  | EGRVFSGGGQGA         | 13     | 20           | 0    | 0 | 2    | 1 | 2    | 2 | 3    | 0 | 6    | 4 |
| CVIDMS1 IgG+ mem 75 | 3-73   | 3-22 | 2  | 5  | RLYSYDSGGYRGDWFPD    | 17     | 9            | 0    | 0 | 1    | 2 | 2    | 0 | 0    | 0 | 2    | 2 |
| CVIDMS1 IgG+ mem 79 | 4-39   | 3-10 | 2  | 5  | SNYFASGNFRPFDP       | 14     | 16           | 0    | 0 | 4    | 1 | 1    | 0 | 3    | 2 | 3    | 2 |
| CVIDMS1 IgG+ mem 80 | 3-23   | 3-22 | 2  | 6  | GKESSTSWDPFFAYYYMDV  | 19     | 10           | 0    | 0 | 0    | 1 | 2    | 1 | 1    | 1 | 1    | 3 |
| CVIDMS1 IgG+ mem 83 | 4-34   | 6-13 | 1  | 4  | VGEQLGVDH            | 9      | 5            | 0    | 0 | 0    | 0 | 1    | 0 | 1    | 0 | 1    | 2 |
| CVIDMS1 IgG+ mem 84 | 3-53   | 4-17 | 3  | 4  | QVHTPTVTGFYD         | 12     | 24           | 1    | 0 | 3    | 1 | 3    | 2 | 2    | 1 | 7    | 4 |
| CVIDMS1 IgG+ mem 85 | 4-4    | 3-9  | /  | 4  | AGGYFLSRRGTPFYD      | 15     | 24           | 1    | 0 | 1    | 1 | 1    | 3 | 3    | 1 | 7    | 6 |
| CVIDMS1 IgG+ mem 90 | 3-30-3 | 3-16 | 1  | 6  | TTLGGGYDYSSYYMDV     | 16     | 10           | 0    | 0 | 0    | 1 | 0    | 0 | 1    | 1 | 4    | 3 |
| CVIDMS1 IgG+ mem 94 | 3-30   | 6-13 | 3  | 6  | DRGAAAGTGDGMDV       | 14     | 6            | 0    | 0 | 0    | 0 | 1    | 0 | 0    | 0 | 2    | 3 |
| CVIDMS1 IgG+ mem 95 | 4-31   | 5-24 | 2  | 4  | VGWDGYNLSGHFDY       | 13     | 1            | 0    | 0 | 1    | 0 | 0    | 0 | 0    | 0 | 0    | 0 |

R, amino acid replacement mutation; S, silent mutation



**Table E14:** IgH repertoire and VH mutations of IgG+ memory B cells from HD36

|                  |        |      |    |    |                       | Length | VH Mutations | FWR1 |   | CDR1 |   | FWR2 |   | CDR2 |   | FWR3 |   |
|------------------|--------|------|----|----|-----------------------|--------|--------------|------|---|------|---|------|---|------|---|------|---|
|                  | VH     | D    | RF | JH | CDR3 (aa)             |        |              | R    | S | R    | S | R    | S | R    | S | R    | S |
| HD36 IgG+ mem 01 | 4-59   | 3-22 | 2  | 4  | ETNNYGYYYFDY          | 12     | 9            | 1    | 0 | 1    | 0 | 0    | 1 | 1    | 1 | 4    | 0 |
| HD36 IgG+ mem 06 | 4-59   | 5-12 | 2  | 4  | NRETGYDELDY           | 11     | 19           | 2    | 2 | 1    | 0 | 1    | 1 | 2    | 1 | 7    | 2 |
| HD36 IgG+ mem 09 | 4-34   | 2-15 | 2  | 6  | GGRFCDGGRCYSRFYYPAMDV | 21     | 29           | 3    | 1 | 7    | 2 | 1    | 2 | 2    | 0 | 7    | 4 |
| HD36 IgG+ mem 13 | 3-30-3 | 6-13 | 3  | 1  | LAAAGNFQE             | 9      | 4            | 0    | 0 | 1    | 1 | 1    | 0 | 0    | 0 | 0    | 1 |
| HD36 IgG+ mem 15 | 3-9    | 1-7  | 3  | 6  | SVTGAQKGDYYGMDV       | 15     | 4            | 0    | 0 | 0    | 0 | 1    | 0 | 0    | 0 | 2    | 1 |
| HD36 IgG+ mem 17 | 1-2    | /    | /  | 4  | VFERSFILGVDY          | 12     | 31           | 2    | 0 | 5    | 1 | 4    | 1 | 5    | 1 | 10   | 2 |
| HD36 IgG+ mem 18 | 3-7    | 4-17 | 2  | 4  | ARLGGGYADRYFDN        | 15     | 22           | 2    | 0 | 2    | 1 | 2    | 0 | 5    | 0 | 8    | 2 |
| HD36 IgG+ mem 20 | 3-48   | 3-10 | 2  | 4  | SGSGSFVF              | 8      | 16           | 0    | 1 | 3    | 0 | 2    | 0 | 2    | 1 | 5    | 2 |
| HD36 IgG+ mem 21 | 3-30-3 | 2-15 | 2  | 5  | DGCSGFSCNVLGFDL       | 15     | 27           | 2    | 1 | 3    | 0 | 4    | 1 | 4    | 1 | 7    | 4 |
| HD36 IgG+ mem 23 | 3-11   | 5-12 | 2  | 6  | DSGGYDFASYYYYGVDV     | 17     | 14           | 0    | 0 | 0    | 0 | 1    | 0 | 5    | 0 | 5    | 3 |
| HD36 IgG+ mem 24 | 3-23   | 3-16 | 2  | 6  | DWDDYFWGSYRYTDYYGLDV  | 21     | 26           | 0    | 0 | 2    | 1 | 3    | 0 | 5    | 3 | 7    | 5 |
| HD36 IgG+ mem 26 | 3-23   | 3-10 | 1  | 3  | DLETLWFGRGAFDI        | 15     | 14           | 1    | 2 | 0    | 0 | 2    | 1 | 3    | 1 | 2    | 2 |
| HD36 IgG+ mem 28 | 3-33   | /    | /  | 3  | SVYGRDGLGDAFDV        | 14     | 20           | 2    | 0 | 1    | 3 | 1    | 0 | 3    | 3 | 4    | 3 |
| HD36 IgG+ mem 30 | 3-23   | 3-10 | 1  | 6  | DLWLNSAAGPMDV         | 13     | 9            | 0    | 0 | 1    | 0 | 2    | 1 | 1    | 0 | 4    | 0 |
| HD36 IgG+ mem 31 | 4-59   | 3-10 | 2  | 5  | SDDYGSGSRPFDP         | 13     | 14           | 0    | 0 | 4    | 1 | 1    | 1 | 0    | 0 | 3    | 4 |
| HD36 IgG+ mem 32 | 3-33   | 3-3  | 2  | 4  | DEGRSGSDY             | 9      | 10           | 0    | 1 | 2    | 0 | 0    | 0 | 0    | 0 | 6    | 1 |
| HD36 IgG+ mem 33 | 4-31   | 4-23 | 2  | 4  | DDGGNGDRYFDY          | 12     | 54           | 5    | 5 | 4    | 4 | 6    | 1 | 3    | 1 | 16   | 9 |
| HD36 IgG+ mem 37 | 4-59   | 1-7  | 2  | 5  | HRENYPHLADL           | 11     | 24           | 0    | 0 | 3    | 1 | 4    | 5 | 3    | 1 | 5    | 2 |
| HD36 IgG+ mem 39 | 1-8    | 3-3  | 2  | 4  | GGYTLDF               | 8      | 32           | 3    | 0 | 1    | 1 | 4    | 2 | 5    | 3 | 9    | 4 |
| HD36 IgG+ mem 40 | 1-18   | 6-19 | 2  | 4  | DRGVYSSSWYDY          | 12     | 19           | 0    | 0 | 1    | 2 | 1    | 2 | 3    | 1 | 6    | 3 |
| HD36 IgG+ mem 42 | 3-30-3 | 2-2  | 2  | 6  | GGYCSSTSCSSYYHYGLDV   | 19     | 13           | 3    | 0 | 4    | 0 | 3    | 0 | 0    | 0 | 1    | 2 |
| HD36 IgG+ mem 43 | 3-15   | /    | /  | 6  | PDV                   | 3      | 5            | 1    | 0 | 1    | 0 | 0    | 0 | 1    | 0 | 2    | 0 |
| HD36 IgG+ mem 46 | 4-59   | 6-19 | 3  | 6  | SLDVAVAPVPPYYGMDV     | 17     | 21           | 2    | 0 | 2    | 1 | 0    | 0 | 3    | 1 | 8    | 4 |

R, amino acid replacement mutation; S, silent mutation

**Table E15:** IgH repertoire and VH mutations of IgG+ memory B cells from HD37

|                  |      |      |    |    |                      | Length | VH Mutations | FWR1 |   | CDR1 |   | FWR2 |   | CDR2 |   | FWR3 |    |
|------------------|------|------|----|----|----------------------|--------|--------------|------|---|------|---|------|---|------|---|------|----|
|                  | VH   | D    | RF | JH | CDR3 (aa)            |        |              | R    | S | R    | S | R    | S | R    | S | R    | S  |
| HD37 IgG+ mem 50 | 4-31 | 3-10 | 2  | 6  | GITMVRGVITYYYYGLDV   | 18     | 13           | 0    | 0 | 3    | 0 | 4    | 0 | 1    | 0 | 4    | 1  |
| HD37 IgG+ mem 51 | 3-23 | 5-24 | 1  | 4  | WEKRWMMHDLGY         | 12     | 27           | 0    | 1 | 1    | 1 | 1    | 2 | 3    | 1 | 10   | 7  |
| HD37 IgG+ mem 53 | 4-61 | 5-5  | 3  | 4  | DTSMVTGYFDF          | 11     | 33           | 2    | 1 | 5    | 1 | 2    | 3 | 2    | 1 | 7    | 9  |
| HD37 IgG+ mem 56 | 3-74 | 3-10 | 2  | 4  | RASGSSDSCCKFDY       | 14     | 8            | 0    | 0 | 2    | 0 | 0    | 0 | 1    | 2 | 2    | 1  |
| HD37 IgG+ mem 60 | 3-13 | 3-9  | 1  | 5  | GTHVGWAGLHFDS        | 13     | 15           | 0    | 0 | 0    | 2 | 1    | 0 | 2    | 0 | 7    | 3  |
| HD37 IgG+ mem 61 | 3-7  | 2-15 | 3  | 5  | DRGGVDSAATPNWFDP     | 16     | 22           | 2    | 1 | 4    | 0 | 0    | 2 | 2    | 0 | 7    | 4  |
| HD37 IgG+ mem 62 | 3-7  | 6-19 | 2  | 4  | EVPLHLSLGSWYFDY      | 14     | 11           | 0    | 0 | 1    | 0 | 0    | 1 | 1    | 0 | 5    | 3  |
| HD37 IgG+ mem 63 | 3-30 | 4-17 | 2  | 4  | EGPPYGDYVDFDY        | 14     | 31           | 0    | 0 | 3    | 3 | 1    | 1 | 6    | 0 | 10   | 7  |
| HD37 IgG+ mem 64 | 3-30 | 5-24 | 2  | 4  | SSRDGYNPKY           | 10     | 0            | 0    | 0 | 0    | 0 | 0    | 0 | 0    | 0 | 0    | 0  |
| HD37 IgG+ mem 65 | 3-73 | /    | /  | 6  | HGVREEAQAQLYYGMDV    | 18     | 43           | 1    | 3 | 5    | 4 | 4    | 1 | 6    | 1 | 7    | 11 |
| HD37 IgG+ mem 67 | 4-59 | /    | /  | 3  | EEQSLGTFDI           | 10     | 20           | 0    | 0 | 3    | 0 | 2    | 0 | 1    | 0 | 12   | 2  |
| HD37 IgG+ mem 69 | 5-51 | /    | /  | 3  | HPNSLDMGTEI          | 11     | 14           | 0    | 0 | 3    | 1 | 1    | 1 | 1    | 1 | 5    | 1  |
| HD37 IgG+ mem 72 | 3-23 | 2-21 | 3  | 5  | DVTVMLTADSFDP        | 13     | 13           | 0    | 0 | 0    | 0 | 2    | 1 | 2    | 2 | 4    | 2  |
| HD37 IgG+ mem 73 | 3-13 | 1-26 | 3  | 6  | GATIVNFYFYGMDV       | 15     | 15           | 0    | 0 | 1    | 1 | 1    | 2 | 2    | 1 | 5    | 2  |
| HD37 IgG+ mem 77 | 3-23 | 2-21 | 2  | 3  | GAPCGDCTSFDI         | 13     | 30           | 3    | 1 | 5    | 0 | 3    | 1 | 3    | 3 | 10   | 1  |
| HD37 IgG+ mem 80 | 1-8  | 6-6  | 2  | 5  | GQFLASLLSP           | 11     | 37           | 2    | 1 | 6    | 2 | 2    | 1 | 2    | 1 | 14   | 6  |
| HD37 IgG+ mem 85 | 1-2  | 3-10 | 2  | 3  | VRSSRSGTYFPNDSFDL    | 18     | 32           | 2    | 2 | 4    | 0 | 5    | 2 | 0    | 0 | 11   | 6  |
| HD37 IgG+ mem 87 | 4-34 | 1-26 | 3  | 6  | GRVGSIEYSITYYYYGMDV  | 20     | 31           | 2    | 2 | 2    | 0 | 1    | 3 | 2    | 1 | 14   | 4  |
| HD37 IgG+ mem 88 | 4-4  | /    | /  | 4  | EGPNRATRELDH         | 12     | 18           | 0    | 1 | 3    | 0 | 2    | 0 | 4    | 0 | 4    | 4  |
| HD37 IgG+ mem 90 | 4-59 | 1-26 | 2  | 4  | GPYGGTYDVAHGGFDF     | 18     | 33           | 1    | 0 | 3    | 2 | 1    | 2 | 4    | 1 | 9    | 10 |
| HD37 IgG+ mem 91 | 1-46 | /    | /  | 4  | GFYGYDS              | 7      | 23           | 0    | 1 | 4    | 0 | 1    | 2 | 3    | 3 | 6    | 3  |
| HD37 IgG+ mem 94 | 4-39 | /    | /  | 6  | TSWFSRVLDHYALDV      | 15     | 32           | 0    | 0 | 7    | 0 | 4    | 0 | 3    | 1 | 10   | 7  |
| HD37 IgG+ mem 96 | 3-30 | 2-2  | 2  | 4  | DQAPYPYCSRTSCYGGGFDY | 20     | 4            | 0    | 0 | 0    | 0 | 1    | 0 | 2    | 0 | 0    | 1  |

R, amino acid replacement mutation; S, silent mutation
