# Supplementary material
Source: PubMed Central journal article supplement (PMC6400323)

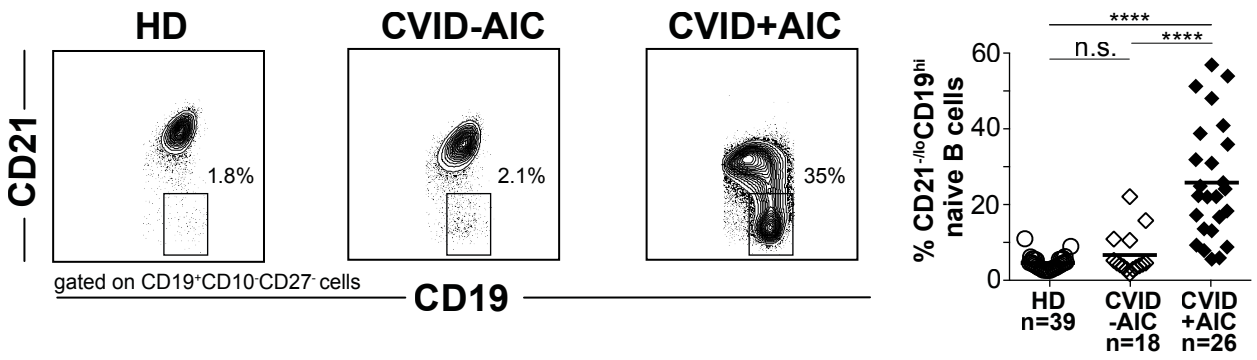

Supplement: NIHMS1512237-supplement-1.pdf [file NIHMS1512237-supplement-1.pdf]

Fig E2

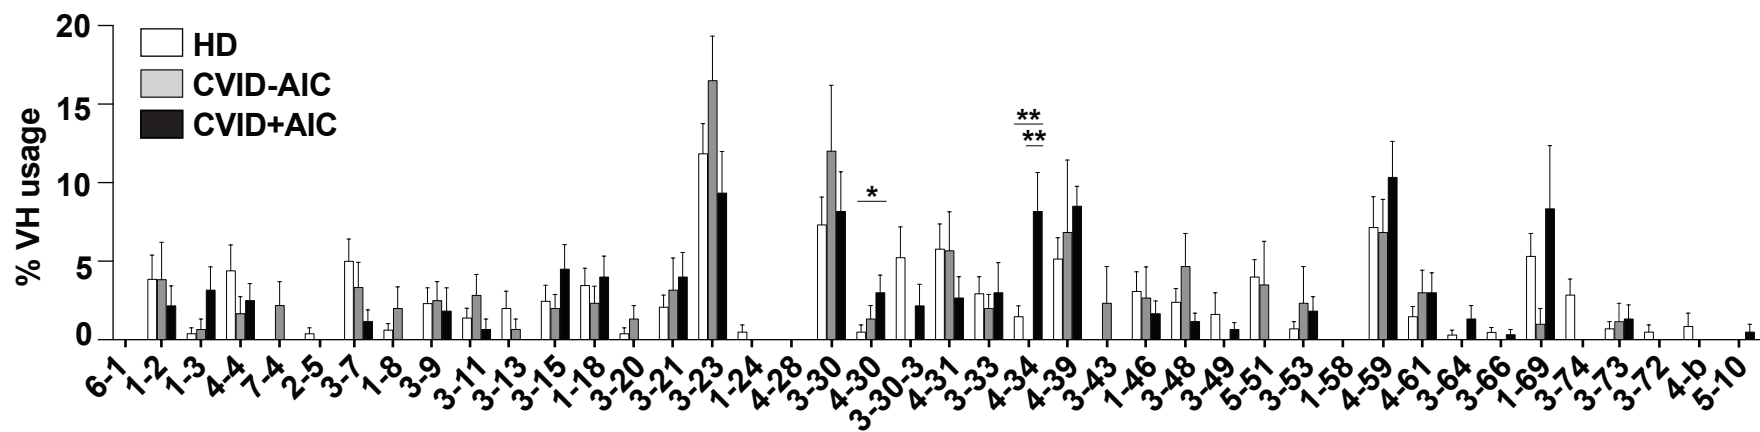

Supplement: NIHMS1512237-supplement-2.pdf [file NIHMS1512237-supplement-2.pdf]

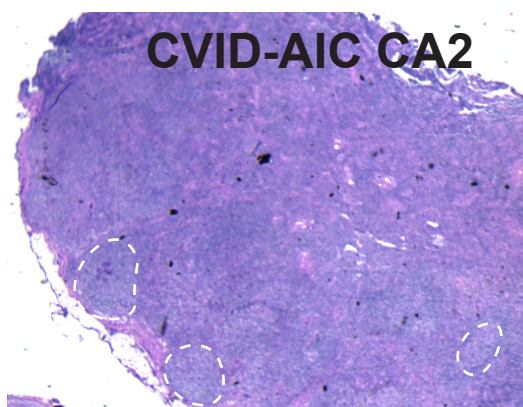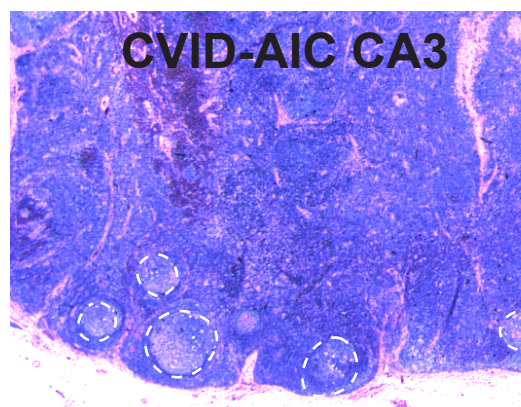

Supplement: NIHMS1512237-supplement-3.pdf [file NIHMS1512237-supplement-3.pdf]

Fig E4

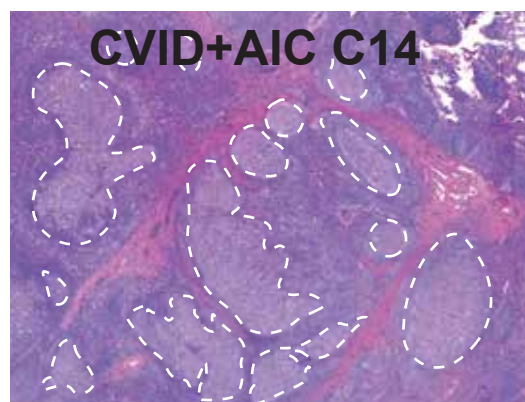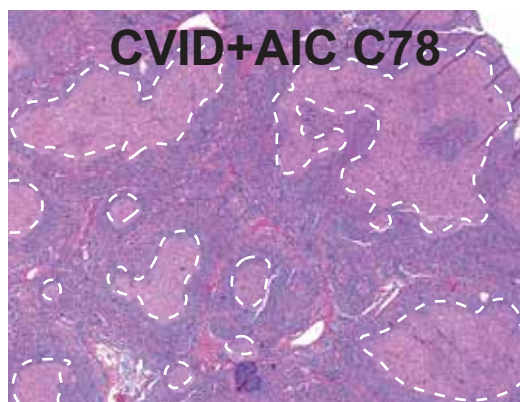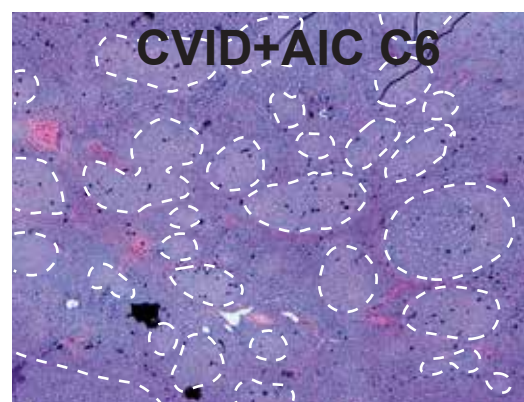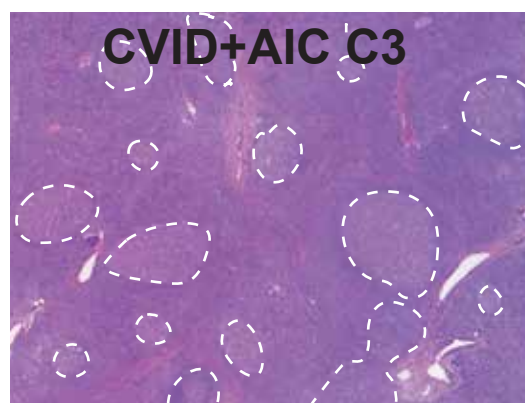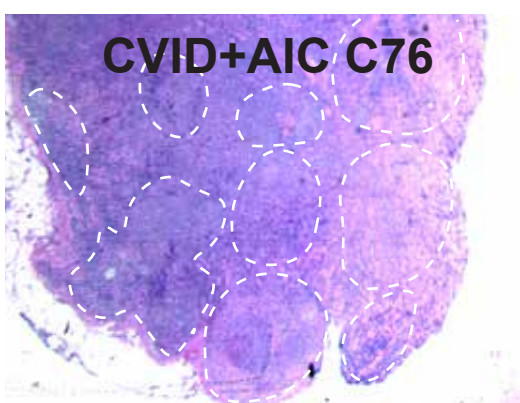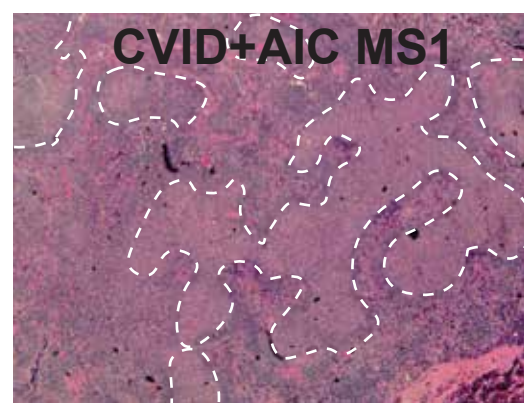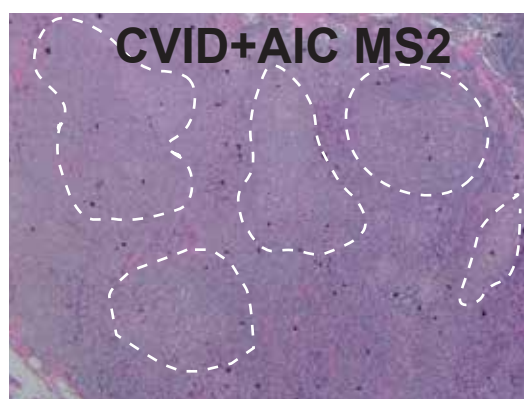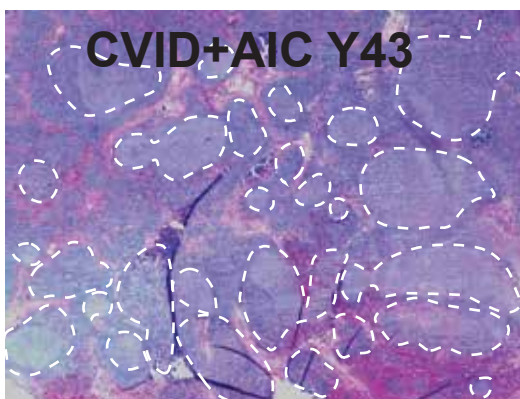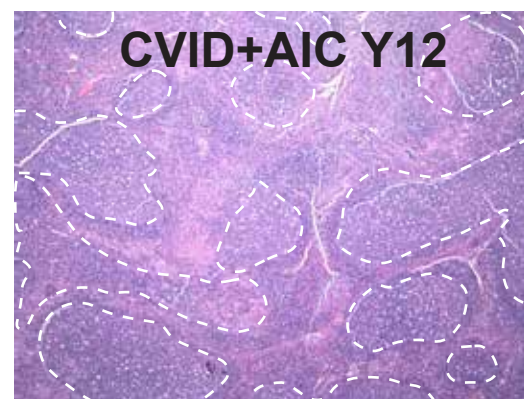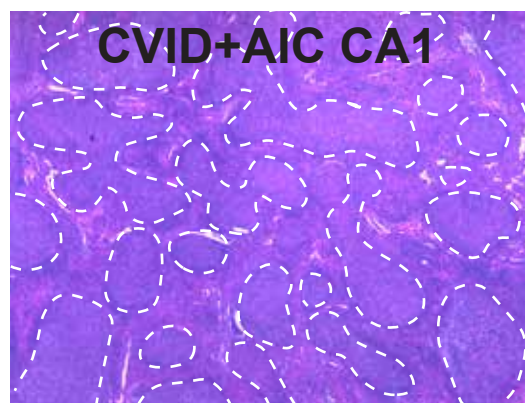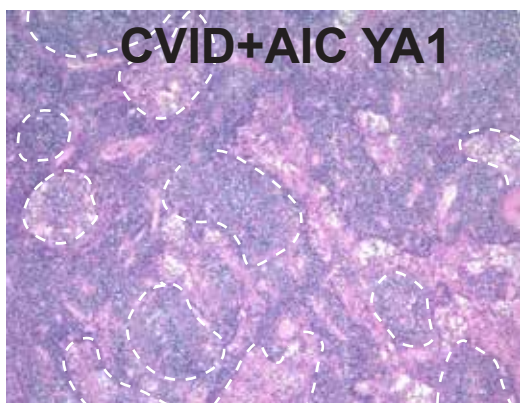

Supplement: NIHMS1512237-supplement-4.pdf [file NIHMS1512237-supplement-4.pdf]

Fig E5

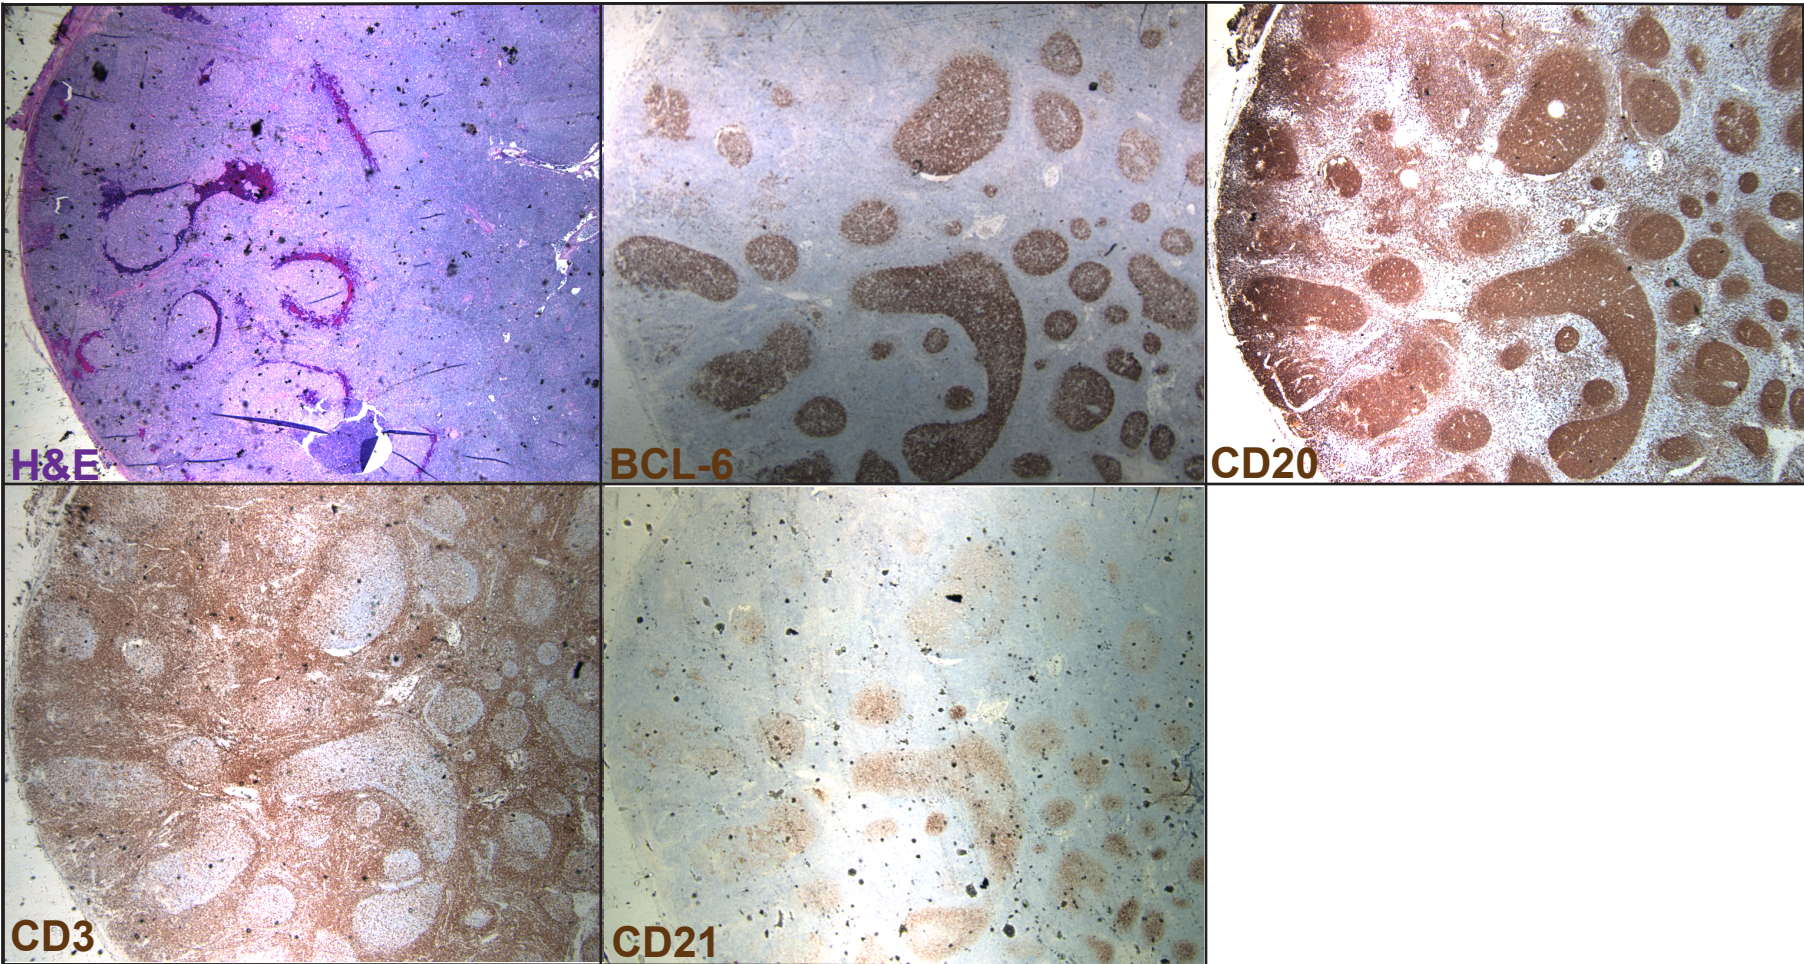

Supplement: NIHMS1512237-supplement-5.pdf [file NIHMS1512237-supplement-5.pdf]

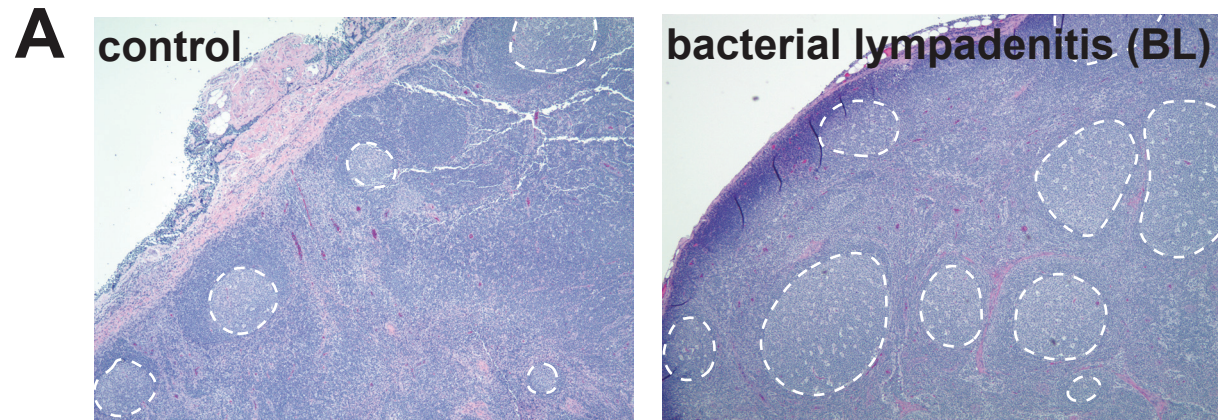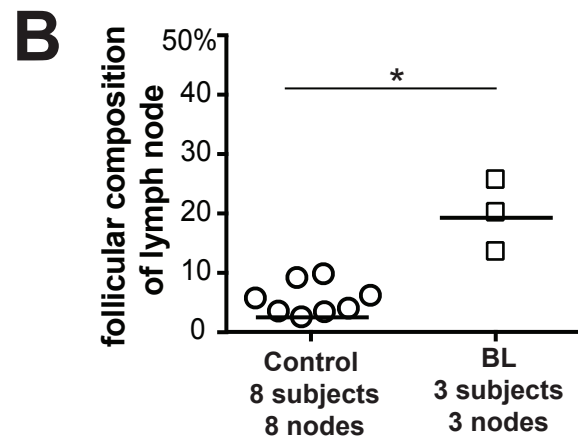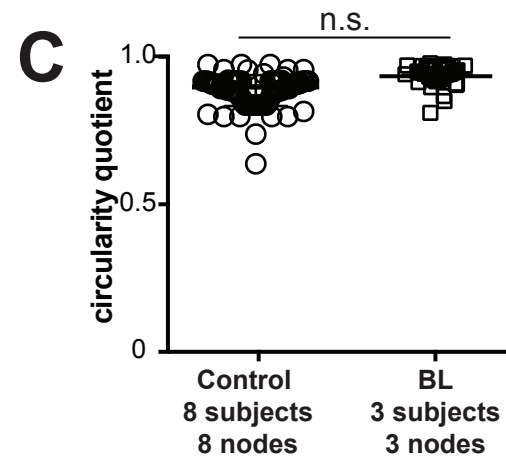

Supplement: NIHMS1512237-supplement-6.pdf [file NIHMS1512237-supplement-6.pdf]
